1 ***wnt4a* promotes female development and reproductive duct elongation in**  
2 **zebrafish**

3 Michelle E. Kossack<sup>1</sup>, Samantha K. High<sup>2</sup>, Rachel E. Hopton<sup>1</sup>, Yi-lin Yan <sup>2</sup>, John H.  
4 Postlethwait<sup>2\*</sup>, Bruce W. Draper<sup>1\*</sup>

5  
6 <sup>1</sup> Department of Molecular and Cellular Biology; University of California Davis; Davis,  
7 CA, 95616; USA

8 <sup>2</sup> Institute of Neuroscience; University of Oregon; Eugene, OR, 97403; USA

9 \* Correspondence: [jpostle@uoregon.edu](mailto:jpostle@uoregon.edu); [bwdraper@ucdavis.edu](mailto:bwdraper@ucdavis.edu)

10

11 **KEYWORDS**

12 *wnt4a*, sex determination, sex differentiations, zebrafish, gonad development,  
13 reproductive duct, *wnt4*,

14

15 **SUMMARY**

16 Wnt4 is a key regulator of ovary development in mammals, but it is not known if it plays  
17 a similar role in other vertebrates. Here we show that zebrafish *wnt4a* is the ortholog of  
18 mammalian *Wnt4*. We show that *wnt4a* is expressed in zebrafish somatic gonad cells  
19 during the time sex determination likely occurs. Through analysis of *wnt4a* mutants, we  
20 show that Wnt4a promotes female sex determination and the development of the male  
21 and female reproductive. We conclude that Wnt4/Wnt4a is likely a conserved regulator  
22 of ovarian and reproductive duct development in all vertebrates

23 **ABSTRACT**

24 In laboratory strains of zebrafish, sex determination occurs in the absence of a typical  
25 sex chromosome and it is not known what regulates the proportion of animals that  
26 develop as male or female. Many sex determination and differentiation genes that act  
27 downstream of a sex chromosome are well conserved among vertebrates, but studies  
28 that test their contribution to this process have mostly been limited to mammalian  
29 models. In mammals, WNT4 is a signaling ligand that is essential for ovary and  
30 Müllerian duct development, where it function, in part, to antagonize the male-promoting  
31 FGF9 signal. Wnt4 is highly conserved in non-mammalian vertebrates, but it is not  
32 known if Wnt4 plays a role in sex determination and/or the differentiation of sex organs  
33 outside of mammals. This is an especially interesting question in teleost, such as  
34 zebrafish, because they lack an Fgf9 ortholog. Here we show that *wnt4a* is the ortholog  
35 of mammalian *Wnt4*, and that *wnt4b* was present in the last common ancestor of  
36 humans and zebrafish, but was lost in mammals. We found that *wnt4a* is expressed in  
37 the somatic cells of juvenile gonads during the time sex determination likely occurs. We  
38 show that *wnt4a* loss-of-function mutants develop predominantly as males and conclude  
39 that *wnt4a* activity promotes female sex determination in zebrafish. Additionally, both  
40 male and female *wnt4a* mutants are sterile because their reproductive ducts do not  
41 connect to the vent, where *wnt4a* is normally expressed. Yet when dissected from  
42 homozygous *wnt4a* mutant gonads, both sperm and eggs can produce fertile offspring.  
43 Together these results strongly argue that Wnt4a is a conserved regulator of female sex  
44 determination and reproductive duct development in non-mammalian vertebrates.

45

46 **INTRODUCTION**

47           Zebrafish (*Danio rerio*) is a major model research organism, yet little is known  
48 about its underlying molecular mechanism of sex determination. Zebrafish that were  
49 domesticated for laboratory use do not have a single sex chromosome; instead, several  
50 loci have been identified that appear to influence sex ratios in a strain-dependent  
51 manner (Bradley *et al.* 2011; Anderson *et al.* 2012; Howe *et al.* 2013). In contrast, non-  
52 domesticated strains use a ZZ/ZW genetic sex determination mechanism, with the  
53 major sex locus being located on chromosome 4 (Wilson *et al.* 2014). Until this locus is  
54 characterized, the conserved genes involved in sex determination and/or differentiation  
55 in other vertebrates may offer insight into zebrafish sex determination.

56           Although domesticated zebrafish do not possess a major sex determining locus,  
57 some progress has been made toward understanding how sex is determined. Overt sex  
58 differences are not apparent until about 20-30 days post-fertilization (dpf), when males  
59 and females tend to differ in number of oocytes, with female gonads generally having  
60 more oocytes than male gonads (Wang *et al.* 2007). It is therefore presumed that  
61 definitive sex determination occurs sometime between 20-25dpf, though an earlier time  
62 point cannot be ruled out.

63           Prior to sex determination, the zebrafish gonad, like the mammalian gonad, is  
64 bipotential. Starting around 10dpf, a subset of germ cells in all zebrafish enter meiosis  
65 to form early stage oocytes (Takahashi 1977) establishing the bipotential gonad. At the  
66 same time, based on gene expression analysis, the somatic gonad is a mixture of male-  
67 and female-like cells. For example, we and others have shown that during this stage,  
68 some somatic gonad cells begin to express the female-specific gene *cyp19a1a*  
69 (*aromatase*), while neighboring cells express the male-specific gene *anti-Müllerian*

70 *hormone (amh)* (Rodríguez-Marí *et al.* 2005; Leerberg *et al.* 2017). Beginning around  
71 20dpf, oocytes in some individuals undergo apoptosis as these gonads begin the  
72 transition to testis development. In contrast, oocytes in gonads destined to become  
73 ovaries continue their maturation (Uchida *et al.* 2002; Maack and Segner 2003).  
74 Importantly, if all germ cells, or specifically oocytes, are ablated prior to or during the  
75 bipotenital phase, all animals develop as phenotypic males (Slanchev *et al.* 2005;  
76 Siegfried and Nüsslein-Volhard 2008; Rodríguez-Marí *et al.* 2010; Dai *et al.* 2015).  
77 These results led to the model that oocytes produce a signal that stabilizes female  
78 development; in the absence of a threshold level of the signal, the animals develop as  
79 males. The identity of the oocyte-producing signal or how it affects sex determination of  
80 somatic gonad cells remains to be determined.

81 Growing evidence suggests that Wnt signaling may also play a conserved role in  
82 teleost sex determination and/or differentiation. In zebrafish, over-expression of a  
83 dominant-negative TCF transcription factor, the downstream effector of the canonical  
84 Wnt signaling pathway, increases the production of males over females (Sreenivasan *et al.*  
85 2014). Thus canonical Wnt signaling appears to be involved in female sexual  
86 development in zebrafish. In mammals, WNT4 is the WNT ligand involved in sex  
87 determination (Vainio *et al.* 1999), but the specific Wnt ligand that functions to regulate  
88 sex determination in zebrafish remains to be determined.

89 WNT4 (wingless-type MMTV integration site family, member 4) is a signaling  
90 ligand that binds to the Frizzled receptor and activates the canonical Wnt signaling  
91 pathway (as reviewed in (Nusse and Clevers 2017)). In mammals, which utilize an  
92 XX/XY genetic sex determination system, Wnt4 is critical for female sex determination.

93 In addition the early gonad is bipotential and both sexes initially express the male-  
94 specific gene *fibroblast growth factor 9 (Fgf9)* in the overlying gonadal epithelium while  
95 the underlying mesonephros expresses the female-specific gene *Wnt4* (Vainio *et al.*  
96 1999; Bowles *et al.* 2010). In the absence of *Sry*, the Y-linked male sex determinant,  
97 WNT4 inhibits the expression of FGF9 and the gonad develops into an ovary that  
98 continues to express WNT4. In contrast, expression of SRY in XY animals stabilizes  
99 *Fgf9* expression, which in turn leads to the inhibition of *Wnt4*, and thus testis  
100 development (Kim *et al.* 2006). Importantly, XX mice lacking WNT4 sex-revert to male  
101 (Vainio *et al.* 1999), demonstrating that WNT4 is necessary for female development.  
102 Interestingly, simultaneous loss of WNT4 and FGF9 in XY animals results in normal  
103 testis development, arguing that the main role of FGF9 in males is to antagonize the  
104 female-promoting WNT4 signal (Jameson *et al.* 2012). Additionally, mutations in the  
105 human *WNT4* gene can lead to a variety of reproductive diseases that affect ovary  
106 development, including Polycystic ovary syndrome (PCOS) (Pellegrino *et al.* 2010) and  
107 female sex reversal and dysgenesis of kidneys, adrenals, and lungs (SERKAL), where  
108 chromosomally XX gonads lacking WNT4 function no longer develop as an ovary and  
109 instead develop as testicular tissue (Mandel *et al.* 2008).

110 Here we show that *Wnt4a* functions to promote female sex determination in  
111 zebrafish. In addition, we show that *Wnt4a* is required for the development of the  
112 reproductive ducts in both male and female zebrafish. These results therefore  
113 demonstrate that *Wnt4* is a conserved regulator of female sex determination or  
114 differentiation in a non-mammalian vertebrate.

115

116 **METHODS**

117 ***Phylogenetic analysis***

118 Phylogenetic analysis of Wnt4a was conducted as previously described (Vilella *et al.*  
119 2009) using the compara gene tree tool found at ensemble.org.

120 ***Zebrafish rearing***

121 The IACUCs at the University of California Davis and the University of Oregon approved  
122 all animals used in this study (protocols #18483 and #14-08R, respectively). Zebrafish  
123 husbandry was performed as previously described (Westerfield 2007) with the following  
124 modifications to the larval fish (5-30dpf) feeding schedule: 5-12dpf: 40 fish/250mL in  
125 static fish water (4parts/thousand (ppt) ocean salts) were fed rotifers (*Brachionus*  
126 *plicatilis*, L-type) twice daily *ad libitum*. 12-15dpf: 40 fish/one liter gently flowing fish  
127 water (<1ppt ocean salts) were fed both rotifers and freshly hatched *Artemia* nauplii *ad*  
128 *libitum* twice daily. 15-30dpf: 40 fish/one liter gently flowing fish water (<1ppt ocean  
129 salts) were fed freshly hatched *Artemia* nauplii *ad libitum* twice daily.

130 ***Fish lines***

131 The zwi:EGFP transgenic line and *wnt4a(fh294)/+* mutant line were developed in an AB  
132 background. The *wnt4a(fh294)/+* mutant line was created by treating adult AB zebrafish  
133 males with ENU and identifying sequence changes in the *wnt4* gene (Moens 2009). The  
134 resulting *wnt4a* mutation is a nucleotide substitution that creates a premature stop  
135 codon at amino acid 307 of 352 (Moens 2009). The *wnt4a(uc55)* and *wnt4a(uc56)*  
136 alleles were produced by CRISPR/Cas9 genome editing, with the following guide RNA

137 targeting exon two: 5' – AGCTGTCGTCGGTGGGGAGC(PAM)-3. *wnt4a(uc55)* and  
138 *wnt4a(uc56)* are predicted to cause a translational frame shift in exon two.

### 139 ***Fluorescent in situ hybridization (FISH)***

140 The *wnt4a in situ* probe was generated by PCR (see Supplemental Table 1 for primers)  
141 producing a 1987bp fragment. These were cloned into pGEM-T Easy vector (Promega).  
142 For whole mount studies on 10-30dpf gonads, *wnt4a* was hybridized at a concentration  
143 of 1:200 at 65°C to permeabilized tissue for 48 hours, after which whole-mount gonads  
144 were developed using an Alkaline-Phosphatase reaction with FastRed (Sigma) for 8  
145 hours. Vasa antibody (1:1500) staining was performed after a glycine wash as  
146 described in (Draper 2012). Gonads were imaged with an Olympus FV1000 laser  
147 scanning confocal microscope. Acquired images were adjusted equally using ImageJ.

### 148 ***RT-PCR for genes of interest***

149 RNA was extracted from the gonads of three individuals at 90dpf or 30dpf and RNA was  
150 combined before reverse transcription. Amplification of *wnt4a*, *wnt4b*, *cyp19a1a*, *amh*,  
151 and *rpl13a* was performed with the following program: Step 1: 94°C for two minutes,  
152 Step 2: 94°C for 15 seconds, 65°C for 15 seconds, 72°C for 15 seconds, repeated 28  
153 times, Step 3: 72°C for two minutes. Primers listed in Supplemental Table 1. Products  
154 were run on a one percent agarose gel and imaged.

### 155 ***Genotyping***

156 *wnt4a (fh294) PCR*: The primers used for genotyping the *wnt4a(fh294)* mutant line are  
157 listed in the Supplemental Table 1 using the following PCR conditions: Step 1: 94°C for  
158 one minute; 35 cycles of: 94°C for 30 seconds, 60°C for 30 seconds, 72°C for one

159 minute and 30 seconds; followed by 15°C until program was ended. Resulting  
160 amplicons were digested with Ddel at 37°C overnight (Moens 2009). Sizes of bands  
161 after Ddel digest: 384bp (wild-type), 270bp + 114bp (mutant).

162 *wnt4a(fh295)* PCR: Genomic DNA was extracted and fh295 mutant fish were identified  
163 using HRMA (Dahlem *et al.* 2012) using primers listed in Supplemental Table 1. The  
164 program was as follows: Step 1: 95°C for 1 minute; Step 2: 39 cycles of 94°C for 10  
165 seconds, 69°C for 15 seconds; Step 3: 94°C for 20 seconds; Step 4: 72°C for 20  
166 seconds; Followed by a melt profile from 80-92°C with increments of 0.2°C.

167 *wnt4a(uc55 and uc56)* PCR: The primer pairs used for PCR genotyping are listed in  
168 Supplemental Table 1, using the following PCR protocol: Step 1: 94°C for one minute;  
169 Step 2: 34 cycles of: 94°C for 10 seconds, 55°C for 10 seconds; Step 3: 72°C for 15  
170 seconds. The PCR products were separated on a three percent agarose gel: wild-type:  
171 123bp, *wnt4a(uc55)*: 140bp, *wnt4a(uc56)*:149bp.

## 172 ***Sex Ratios and Characterization of Mutant Phenotypes***

173 At 90dpf or more, fish were genotyped and sacrificed. Secondary sexual characteristics  
174 were examined, and the gonad of each fish was dissected to confirm gonadal sex. A  
175 subset from animals of each genotype was randomly measured for standard length.  
176 Characterization of mutant development was performed by Anti-Vasa antibody staining  
177 as described previously (Draper 2012).

## 178 ***Mutant fertility assessment***

179 *wnt4a(uc55)* and *wnt4a(fh294)* heterozygous fish were set up in a crossing cage with  
180 either heterozygous or mutant counter parts. Eggs were collected and counted for



181 percent fertilization. Following mating tests, *wnt4a(uc55)* and *wnt4a(fh294)*  
182 heterozygous or mutant males and females were squeezed for sperm or eggs following  
183 techniques described in (Walker and Streisinger 2007). If eggs or sperm were not  
184 released, gonads were dissected and fertilized with the heterozygous counterpart *in*  
185 *vitro*. Percent of eggs successfully fertilized and embryo survivability was tracked to five  
186 dpf.

### 187 ***Hematoxylin and Eosin staining***

188 At 90dpf, *wnt4a(uc55)* and *wnt4a(fh295)* mutant and wild-type fish (n=3) were identified  
189 by PCR genotyping, were euthanized, and fixed in Bouin's fixative for 24hrs. The  
190 samples were then embedded in paraffin, cut into 7 $\mu$ m sections and stained with  
191 Hematoxylin and Eosin (H&E). Reproductive ducts were examined and representative  
192 images were taken at 5X on a Zeiss Axiophot microscope.

### 193 ***Micro Computed Tomography (microCT)***

194 At 90dpf fish were genotyped and confirmed to be wild-type or *wnt4a(uc55)* mutant  
195 (n=3). Fish were anesthetized with MS22 for 5 minutes and exsanguinated by cutting off  
196 the tail and placing the fish head up in a filter column in a 1.5mL micro-centrifuge tube  
197 followed by centrifuging at 40rcf at room temperature for five minutes. The blood clot  
198 was then removed and the fish was centrifuged again. Fish were then fixed in PFA for at  
199 least 24 hours. Before imaging, fish were placed in 2.75% Lugol's, (14mL/fish) for 24  
200 hours and then washed in 1x PBS for one hour.

201 Zebrafish were imaged at the Center for Molecular and Genomic Imaging (UC  
202 Davis) with X-ray CT. 90dpf fish were embedded in one percent agar gel and positioned

203 in a 15mm diameter conical tube. The straw was mounted on an aluminum post for  
204 placing in the CT scanner. X-ray tomographic images were obtained on the Center's  
205 MicroXCT-200 specimen CT scanner (Carl Zeiss X-ray Microscopy). Samples were  
206 mounted on the scanner's sample stage, which can be positioned to the submicron  
207 level. Scan parameters were adjusted based on the manufacturer's recommended  
208 guidelines. The 4x objective of the MicroXCT was chosen for optimal spatial resolution  
209 of reproductive ducts. The source and detector distances were set at 30mm and 10mm,  
210 respectively. Once the source and detector settings were established, the optimal x-ray  
211 filtration was determined by selecting one of 12 proprietary filters; in this case, no  
212 filtration was necessary. Following this procedure, the optimal voltage and power  
213 settings were determined for optimal contrast (80kV and 100 $\mu$ Amp). 1600 projections  
214 over 360 degrees were obtained with 0.75 seconds per projection. The camera pixels  
215 were binned by two and the source-detector configuration resulted in a voxel size of  
216 5.0693 $\mu$ m. Tomographic images were reconstructed with a center shift (7.11 pixels) and  
217 beam hardening parameter value of 0.2 to obtain optimized images. A smoothing filter  
218 of kernel size 0.7 was applied during reconstruction. Images were reconstructed into 16-  
219 bit values.

### 220 ***In situ Hybridization on sections***

221 Animals were collected at multiple stages of zebrafish male reproductive duct  
222 development. Animals were then euthanized, fixed, and cryosectioned as previously  
223 described (Rodríguez-Marí *et al.* 2005). The probe for *wnt4a* was created using primers  
224 listed in Supplemental Table 1. The *wnt4a* cDNA was cloned using the TOPO vector

225 and used to synthesize DIG-labeled probes. For *in situ* hybridization experiments, two  
226 25dpf, two 35dpf male, and two 55dpf male zebrafish were used.

### 227 ***Data and reagent availability***

228 All fish lines are available upon request, and will be deposited at the Zebrafish  
229 International Stock Center (ZIRC). All supplementary figures are available at Figshare:

230 FigS1 RT-PCR analysis of *wnt4a* expression in males and females (.tif).

231 FigS2. *wnt4a* is expressed in somatic gonad cells (.tif).

232 FigS3. CRISPR/Cas9-induced *wnt4a* mutations (.tif).

233 FigS4. External phenotype of *wnt4a* mutants (.tif).

234 FigS5. Histological analysis of *wnt4a* mutant gonads (.tif).

235 FigS6. Movie, 3D renderings of the male reproductive ducts (.mov)

236 FigS7. Movie, 3D renderings of the female male reproductive ducts (.mov)

237 FigS8. Time course of reproductive duct extension in wild-type and *wnt4a* mutants.

238

## 239 **RESULTS**

### 240 ***wnt4a* is the ortholog of mammalian *Wnt4***

241 Mammalian genomes contain a single *WNT4* gene but most teleost genomes  
242 have two *Wnt4*-related genes called *wnt4a* and *wnt4b* (Ungar *et al.* 1995; Liu *et al.*  
243 2000). Connectivity of teleost genomes to the human genome requires accurate  
244 designation of orthologs, which necessitates an understanding of gene histories. The

245 two teleost *wnt4*-related genes could have resulted from either: 1) gene duplication after  
246 the divergence of mammalian and teleost lineages, for example, in the teleost genome  
247 duplication event (Amores *et al.* 1998; Postlethwait *et al.* 1998; Jaillon *et al.* 2004) or 2)  
248 duplication before the divergence of the human and zebrafish lineages followed by loss  
249 in the mammalian lineage. To test these models, we studied gene phylogenies and  
250 conserved syntenies. Phylogenetic analysis showed that ancestral lobe-finned  
251 vertebrates had two *wnt4*-related genes, the *wnt4a* and *wnt4b* clades, because several  
252 lobe-finned animals (birds, reptiles, and coelacanth) have these genes today (Figure  
253 1A). Ancestral ray-finned vertebrates also had both *wnt4* clades because orthologs of  
254 both appear in spotted gar and teleost fish (Figure 1A). This evidence shows that the  
255 last common ancestor of human and zebrafish had both *wnt4a* and *wnt4b*, ruling out the  
256 hypothesis that *wnt4a* and *wnt4b* arose in the teleost genome duplication and  
257 supporting the loss of *wnt4b* in the origin of mammals.

258 Several lines of evidence argue that *wnt4a* and *wnt4b* have their origin in the two  
259 rounds of vertebrate genome duplication (VGD1 and VGD2), but not from  
260 retrotransposition, a simple one-gene duplication event or the teleost genome  
261 duplication event. First, the presence of introns in orthologous locations in both *wnt4*  
262 genes rules out the origin of either gene by retrotransposition. Second, analysis of  
263 conserved syntenies shows that *wnt4a* is located on zebrafish (*D. rerio*) chromosome  
264 Dre11 adjacent to *cdc42* while *wnt4b* is adjacent to *cdc42l* on Dre16, arguing that *wnt4a*  
265 and *wnt4b* arose from a genomic event more complicated than a simple one-gene  
266 tandem duplication (Amores *et al.* 1998) Figure 1B. Third, the teleost duplication event  
267 ohnolog of *wnt4a*-containing Dre11 is Dre23, while that of *wnt4b*-containing Dre16 is

268 Dre19. (Amores *et al.* 1998) Figure 1B). Finally, the portion of Dre11 that contains  
269 *wnt4a* is orthologous to spotted gar (*Lepisosteus oculatus*) chromosome Loc25, which  
270 contains gar *wnt4a*, while the portion of Dre16 that contains *wnt4b* is orthologous to  
271 Loc26, which contains gar *wnt4b* (Figure 1C), as expected from whole genome  
272 duplication but not by tandem duplication. The finding that Loc25 and Loc26 are at least  
273 in part paralogous (Figure 1C) and that the gar lineage did not experience a genome  
274 duplication event after the divergence of ray-finned and lobe-finned vertebrates (Amores  
275 *et al.* 2011; Braasch *et al.* 2016) are as predicted by the hypothesis that *wnt4a* and  
276 *wnt4b* arose in one of the two genome duplication events at the base of the vertebrate  
277 radiation (Dehal and Boore 2005; Smith and Keinath 2015) and the *WNT4B* gene was  
278 lost in the mammalian lineage after it split from the bird lineage. We therefore conclude  
279 that the zebrafish *wnt4a* gene is the ortholog of the human gene *WNT4*.

280

### 281 **Early gonadal somatic cells express *wnt4a***

282 In mice, both XX and XY individuals express *Wnt4* in the early bipotential gonads  
283 (nine days post conception); thereafter, male gonads suppress *Wnt4* expression but  
284 female gonads maintain *Wnt4* expression (Vainio *et al.* 1999). We therefore used  
285 reverse transcription polymerase chain reaction (RT-PCR) to determine if the  
286 expression of either *wnt4a* or *wnt4b* were sexually dimorphic in adult and juvenile  
287 zebrafish gonads. Experiments detected *wnt4a* but not *wnt4b* in the ovary and *wnt4b*  
288 but not *wnt4a* in the testis in both adult and juvenile gonads (Supplemental Figure 1A,  
289 1B). Thus, like mammalian *WNT4*, *wnt4a* in zebrafish appears to be associated with  
290 ovarian development.

291 We next asked where *wnt4a* is expressed in larval zebrafish gonads bracketing  
292 the sex determination and early sex differentiation period between 10 and 25dpf.  
293 Fluorescent RNA *in situ* hybridization experiments on wild-type gonads detected *wnt4a*  
294 expression in germ cells and in somatic gonad cells in all 17 individuals examined at  
295 10dpf and 12dpf, though levels appeared to be higher in 10dpf gonads (Figures 2A, 2A',  
296 n=8) relative to 12dpf wild-type gonads (Figures 2B, 2B', n=9). In contrast, we were  
297 unable to detect *wnt4a* expression in any gonads in 14dpf individuals (Figure 2C, 2C',  
298 n=6). At 20dpf, *wnt4a* expression was no longer detected in germ cells and appeared in  
299 only a subset of somatic cells (Figure 2D, 2D', n=4). Somatic cell-specific expression of  
300 *wnt4a* increased from 20dpf until 23dpf when *wnt4a* was highly expressed in all gonads  
301 (n=10), specifically in the somatic cells surrounding larger oocytes indicating a  
302 presumptive ovary (Figure 2E, 2E'). Less expression was found surrounding smaller  
303 oocytes or cyst-like divisions of a presumptive testis (Figure 2F, 2F'). At 25dpf, when  
304 gonads had committed to the ovary or testis fate, which can be distinguished based on  
305 the numbers of oocytes present (Uchida *et al.* 2002), *wnt4a* was detected only in female  
306 gonads (Figure 2G, 2G', n=6) and was no longer detected in developing male gonads  
307 (Figure 2H, 2H', n=10). This sexually dimorphic expression of *wnt4a* continued  
308 throughout adulthood (Supplemental Figure 1A). We conclude that *wnt4a* is expressed  
309 in a dynamic, sex non-specific pattern in early gonads, and that by 25 dpf onward, its  
310 expression is limited to somatic cells in ovaries.

311 We next asked if we could identify the somatic cell type that expresses *wnt4a* at  
312 23dpf and 25dpf. At this stage, *wnt4a*-expressing cells associated closely with stage 1b  
313 oocytes (20µm – 140µm) and were therefore likely to be either theca cells or granulosa

314 cells. To distinguish between these possibilities, we used the transgenic reporter line  
315 Tg(*cyp19a1a:egfp*), which expresses GFP in theca cells that surround stage 1b oocytes  
316 (Dranow *et al.* 2016). Results showed that *wnt4a* expressing cells did not also express  
317 GFP (n=3, Supplemental Figure 2). We conclude that *wnt4a* is not expressed in theca  
318 cells, but rather in another component of the gonadal soma, likely granulosa cells,  
319 although another gonadal cell type cannot be excluded.

### 320 ***wnt4a* mutants develop predominantly as males**

321 Results so far indicated that *wnt4a* is predominantly expressed in female somatic  
322 gonad cells. This is consistent with the hypothesis that Wnt4a plays a role in female sex  
323 determination in zebrafish. To test this possibility, we analyzed the phenotype of two  
324 ENU-induced alleles of *wnt4a*: *wnt4a(fh294)* and *wnt4a(fh295)*, which were identified by  
325 TILLING (Moens 2009; Choe *et al.* 2013). The *wnt4(fh294)* and *wnt4a(fh295)* alleles are  
326 nonsense point mutations that are predicted to truncate the C-terminus of Wnt4a protein  
327 (Figure 3A). The *wnt4a(fh294)* and *wnt4a(fh295)* mutations result in the deletion of ten  
328 or one of the conserved cysteines, respectively, that are present in the carboxy-  
329 terminus of the Wnt4a protein, and that are necessary for proper folding of WNT  
330 proteins (Miller 2002). Without these residues, the binding of Wnts to the Frizzled  
331 receptor is likely to be disrupted (Janda *et al.* 2012). Importantly, deletion of the  
332 carboxy-terminal half of the *Xenopus Xwnt-8* gene results in a partial protein that has  
333 dominant-negative, cell non-autonomous activity, perhaps because it interferes with  
334 productive interactions between the wild-type XWnt8 ligand and its receptor (Hoppler *et*  
335 *al.* 1996); given the high sequence conservation of Wnt ligands, it was therefore  
336 possible that carboxy-terminal deletions of Wnt4a may behave similarly. To investigate

337 this possibility, we used CRISPR/Cas9 to generate additional mutations targeted to the  
338 N-terminus. The *wnt4a(uc55)* and *wnt4a(uc56)* alleles resulted from a 17bp and 23bp  
339 insertion in exon two, respectively, and are therefore predicted to cause translational  
340 frame shifts, (Figure 3A, Supplemental Figure 3) and hence to be strong loss-of-function  
341 alleles. In support of this prediction, we could not detect any wild-type *wnt4a* mRNA by  
342 reverse transcription-polymerase chain reaction analysis (RT-PCR) in *wnt4a(uc55)*  
343 mutants, suggesting that the mutant transcript is subject to nonsense mediated decay  
344 (data not shown), suggesting that the mutant transcript is subject to nonsense mediated  
345 decay.

346 We first asked if the CRISPR-induced *wnt4a* mutants were viable. We crossed  
347 parents that were heterozygous for each mutant allele, genotyped the resulting offspring  
348 at three months of age, and determined their phenotypic sex. For all four alleles, we  
349 found the expected Mendelian 1:2:1 ratio of the three possible genotypes (*wnt4a*<sup>+/+</sup> :  
350 *wnt4a*<sup>+/-</sup> : *wnt4a*<sup>-/-</sup> ; Supplemental Table 2; Chi-Squared test). In contrast to mammals,  
351 where *Wnt4* mutants are embryonic lethal, *wnt4a* loss-of-function zebrafish mutants are  
352 viable (Supplemental Figure 4). We next determined if loss of Wnt4a function affected  
353 sex ratios (Figure 3B). In the *wnt4(fh295)* in-cross population, *wnt4(fh295)* wild-type fish  
354 were 75.7% male, *wnt4(fh295)* heterozygous fish were 62.6% male whereas the  
355 *wnt4(fh295)* homozygous mutant fish were 93% male (n=3, p<0.05, anova). Similarly,  
356 the *wnt4a(uc55)* mutation resulted in similar ratios (wild-type, heterozygous and  
357 homozygous mutant fish were 66.6%, 76% and 94% male, respectively, n=3, p<0.01,  
358 anova). Homozygous mutants for *wnt4a(fh294)* and *wnt4a(uc56)* also had male sex  
359 bias (98.6% n=141/143 and 100% male n=78/78, respectively). Finally,



360 *wnt4a(uc55)/wnt4a(fh295)* trans-heterozygous fish had a similar male bias compared to  
361 homozygous single mutants (96% male; n= 22/23). These data support two main  
362 conclusions. First, these results indicate that Wnt4a promotes ovary development but is  
363 not absolutely required for ovary development. Second, because the *wnt4a(fh295)*  
364 mutants had the same magnitude of effect on sex ratios as the loss-of-function allele  
365 *wnt4(uc55)*, we conclude that the ENU induced alleles, *wnt4a(fh294)* and *wnt4a(fh295)*,  
366 are also loss-of-function.

367 **Wnt4a is involved in primary sex determination and/or differentiation.**

368 In mammals, WNT4 is required during female primary sex determination (Vainio  
369 *et al.* 1999). In zebrafish, it is not known with certainty when definitive primary sex  
370 determination occurs, but it likely occurs prior to 20dpf, because this is the time at which  
371 oocytes present in the bipotential gonad begin to die by apoptosis in presumptive males  
372 (Takahashi 1977; Uchida *et al.* 2002). The hypothesis that *wnt4a* is required for primary  
373 sex determination and/or differentiation in zebrafish predicts that oocyte apoptosis will  
374 initiate in the majority of mutants at about the same time as it does in wild-type males,  
375 but in a greater proportion of the population. Alternatively, the hypothesis that *wnt4a* is  
376 instead required to maintain female sex differentiation predicts that many animals  
377 should begin to develop as females, but then revert to male phenotype during the early  
378 juvenile stage, as occurs in *bmp15* mutants (Dranow *et al.* 2016). We therefore  
379 compared gonad development between wild-type and *wnt4a* mutants between 23-40dpf  
380 (Figure 3C-3N). Results showed that the majority of *wnt4a* mutant gonads were  
381 morphologically similar to wild-type males at all stages analyzed (compare Figure panel  
382 3G, 3J, 3M to panel 3H, 3K, 3N), but not to wild-type females (compare Figure panel

383 3F, 3I, 3L to panel 3H, 3K, 3N). In particular, early stage oocytes were present in all  
384 gonads at 23dpf regardless of genotype, but by 25dpf, mutant gonads appeared to  
385 contain predominantly pre-meiotic germ cells, which have nuclei containing a single  
386 large nucleolus, similar to those found in presumed wild-type males (Figure 3H). By  
387 40dpf, all mutant gonads had a morphology that was indistinguishable from a wild-type  
388 testis, where germ cells are organized into tubules (compare Figure 3M to 3N). These  
389 data thus argue that *Wnt4a* is involved in primary sex determination and/or  
390 differentiation rather than in the maintenance of a female phenotype.

### 391 ***Wnt4a* mutants are unable to release gametes**

392 The ovaries and testes of *wnt4a* mutant adults are morphologically  
393 indistinguishable from those of their wild-type siblings (Supplemental Figure 5). It was  
394 therefore surprising that neither mutant males nor mutant females produced  
395 progeny when mated to each other or to wild-type fish. For example, *wnt4a(uc55)*  
396 mutant males stimulated wild-type females to lay eggs, but no eggs were fertilized  
397 (n=155 eggs) and for *wnt4a(fh294)*, nine homozygous wild-type male siblings and nine  
398 homozygous mutant males were individually crossed to 2-3 AB wild-type females. We  
399 found that mating with wild-type males produce 349/504 (69.2%) viable offspring, while  
400 those with mutant males produced only unfertilized eggs (n=471).

401 Because our histological analysis showed that mature sperm were present in the  
402 testes of mutant males (Supplemental Figure 5B), we next attempted to expel sperm  
403 from mutants by gentle squeezing. We found that *wnt4a(uc55)* and *wnt4a(fh294)* wild-  
404 type control males released sperm (n=8/9 and 16/21, respectively), but that mutant  
405 males did not (n=0/10 and 0/16 respectively). Finally, we used an *in vitro* fertilization

406 assay to compare fertilization rates of mutant and wild-type sperm isolated from  
407 dissected and macerated testes. We found that, consistent with our histological  
408 analysis, dissection-isolated mutant sperm had similar fertilization rates to sperm  
409 isolated from heterozygous or homozygous wild-type males (for *wnt4a(uc55)*:  
410  $56.1 \pm 35.6\%$  for mutants vs.  $79.3 \pm 7.2\%$ , for wild-types;  $P=0.46$ , Student's T-test and for  
411 *wnt4a(fh294)*:  $72.7\%$  for mutant males and  $52.2\%$  for wild types,  $P=0.71$ .)

412 Similarly, histological analysis showed that ovaries in the mutant females  
413 obtained contained all stages of oocytes, including mature eggs (Supplemental Figure  
414 5D), yet *wnt4a(uc55)* mutant females failed to release eggs when mated to wild-type  
415 males (0/5 mating pairs). In contrast, two of three heterozygous control females  
416 released eggs when mated to a wild-type male. We next tested if we could recover eggs  
417 by gentle squeezing and found that, although two of three control females released  
418 eggs, no *wnt4a(uc55)* mutant females released eggs ( $n=0/5$ ). Finally, we tested if we  
419 could recover mature eggs from dissected ovaries. We found that eggs dissected from  
420 *wnt4a(uc55)* mutant females yielded viable zygotes when fertilized by wild-type sperm,  
421 though at a lower rate than those isolated from heterozygous females ( $16.4 \pm 6.2\%$ ,  $n=3$   
422 mutants females vs.  $61.4 \pm 38.1\%$ ,  $n=4$  heterozygotes females,  $P=0.41$  Student T-test).  
423 These results show that the infertility of *wnt4a* mutant males and females is not due to a  
424 defect in gametogenesis, and we hypothesized that it was due instead to an inability of  
425 mutants to release their gametes.

426

427 **Male and female infertility is caused by reproductive duct malformation**

428           Given that *wnt4a* mutant zebrafish cannot expel their gametes, we asked if they  
429 had defects in the formation of the reproductive ducts. In wild-type males, each testis  
430 connects to the genital orifice by the duct deferens (DD), which extends posteriorly from  
431 the testis and fuses with the genital orifice to form the fused duct deferens (FDD, Figure  
432 4A, 4B). We analyzed duct formation first by histology using Hematoxylin and Eosin  
433 (H&E) stained paraffin sections. We found that although the duct deferens initiated  
434 development in mutant males, their extension was variable and the ducts failed to fuse  
435 (n=3; Figure 4A', 4B').

436           To increase the resolution of assessing duct development in mutants, we next  
437 utilized micro Computed Tomography (microCT) to render 3D representations of the  
438 reproductive ducts in both wild-type and mutant adults. For this analysis, we traced the  
439 structures of interest in individual slices (Figure 4C', 4C'') to build a 3D model of the  
440 complete duct structure (Figure 4C). In wild-type animals, as expected, we could identify  
441 all parts of the reproductive ducts (Figure 4C, 4C', 4C''). By contrast, in *wnt4a(uc55)*  
442 mutant males, we could identified DD but no duct fusion or connection to the genital  
443 orifice (Figure 4D, 4D'; Supplemental Figure 6).

444           In females, histology and microCT analysis revealed a similar defect in  
445 reproductive duct development in *wnt4a* mutants. In wild-type females, the oviduct  
446 wrapped around the posterior end of the ovary and extended ventroposteriorly until it  
447 connected to the genital orifice (Figure 4E, 4F, 4G). In mutant females, however, the  
448 small amount of oviduct tissue present did not fully envelop the posterior end of the  
449 ovaries (Figures 4E', 4H, 4H'; Supplemental Figure 7), and failed to extend towards the  
450 genital orifice (Figure 4F', 4H, 4H'; Supplemental Figure 7). Together, these analyses

451 explain mutant sterility and show that *Wnt4a* is required not for the specification of  
452 reproductive duct development, but is likely required for the growth and/or extension of  
453 the reproductive duct primordium in both male and female zebrafish.

454 To further understand how *Wnt4a* regulates duct development, we first  
455 determined when the ducts form during larval development. We scored duct formation  
456 in wild-type males using serial H&E sections. We evaluated males at four ages from  
457 25dpf to 55dpf and discovered that the ducts appear to originate at the posterior end of  
458 the testis before 25dpf and elongate towards the genital orifice. Reproductive ducts of  
459 wild-type males had reached and fused to the genital orifice by 55dpf (Supplemental  
460 Figure 8).

461 Having established the schedule of duct development, we wanted to learn in  
462 which tissues *wnt4a* acts to cause duct elongation: Does *Wnt4a* act in the extending  
463 duct? Or in the space through which it grows? Or in the target at the vent? To find out,  
464 we analyzed serial transverse sections of wild-type males starting anterior to the gonad  
465 and ending posterior to the genital orifice with alternate sections taken for H&E histology  
466 (see Supplementary Figure 8) and expression analysis of *wnt4a* by in situ hybridization.  
467 At 25 and 35dpf, *wnt4a* expression appeared not in the extending duct, but around the  
468 vent and developing genital orifice, (Figure 5B, 5D). While no *wnt4a* expression was  
469 detected in cells of the DD primordium at 25dpf (Figure 5A), by 35dpf *wnt4a* expression  
470 appeared in cells located ventral to the developing DD (Figure 5C). Importantly, the  
471 domain of *wnt4a* expression preceded the arrival of the ducts to this region.

472 Serial sections showed that wild-type DD connected to the genital orifice  
473 between 45 and 55 dpf (Supplementary Figure 8). Concurrent analysis of alternating

474 sections showed *wnt4a* expression persisted in tissue surrounding the the vent and  
475 genital orifice (Figure 5E, 5F). We conclude that in wild-type male zebrafish, *wnt4a*  
476 expression occurs in the developing genital orifice but not in the extending DD, raising  
477 the hypothesis that Wnt4a might act as a diffusible signal that encourages DD  
478 outgrowth.

479 To further characterize the role of Wnt4a in duct development, we examined duct  
480 elongation in *wnt4a* mutants over time. Results showed that the DD elongated more  
481 slowly in *wnt4a* mutant males than wild-type. The FDD did not connect the DD to the  
482 genital orifice by 55dpf nor was a connection found in elderly 2-year old fish  
483 (Supplemental Figure 8). These results suggest that *wnt4a* expression at the genital  
484 orifice is essential for reproductive duct growth and/or elongation and for formation of  
485 the FDD. The failure of ducts to connect to the genital orifice explains our earlier  
486 observations that *wnt4a* mutants are sterile despite their ability to make fertile eggs and  
487 sperm. The *wnt4a* expression domain anterior to the eventual connection of the FDD  
488 and the genital orifice supports the hypothesis that tissues around the genital orifice  
489 likely secretes Wnt4a protein, and thus signal duct growth, elongation and connection to  
490 the exterior. Thus, as in mammals, Wnt4a may coordinate directional cell migration and  
491 extention of the reproductive duct (Prunskaitė-Hyyryläinen *et al.* 2015).

492

## 493 **DISCUSSION**

494 After more than four decades of use as a major model organism, the mechanism  
495 of sex determination in domesticated zebrafish is still not clear. While a major sex  
496 chromosome has been identified in wild zebrafish, this sex-determining locus appears to

497 have been lost during the domestication of zebrafish strains that are widely used in the  
498 laboratory (Wilson *et al.* 2014). Regardless, there is mounting evidence that many, if not  
499 most, genes that play key roles in sex determination in mammals animals play similar  
500 roles in zebrafish. As an example, the double-sex and mab3 related transcription factor  
501 Dmrt1, a highly conserved regulator of male development across metazoans, is  
502 required for normal male development in zebrafish (Lin *et al.* 2017; Webster *et al.*  
503 2017). Similarly, in vertebrates, WNT4 signaling plays a key role in female sex  
504 determination and accumulating evidence argues that canonical Wnt signaling is also  
505 required for female sex determination in zebrafish, though the specific Wnt ligand had  
506 not been previously identified (Zhang *et al.* 2011; Sreenivasan *et al.* 2014). Experiments  
507 reported here show that the zebrafish ortholog of mammalian WNT4, *wnt4a*, is required  
508 for normal female sex ratios, strongly suggesting that it plays a role in female sex  
509 determination but is not required for female sex determination because a small  
510 percentage of *wnt4a* mutants develop as females. In addition, while WNT4 in mammals  
511 is required for the development of reproductive ducts in the female, but not the male  
512 (Vainio *et al.* 1999), we have shown here that in zebrafish, Wnt4a is required for  
513 reproductive duct development in both females and males. Together, these results  
514 provide further evidence that the underlying mechanisms for sex determination and/or  
515 differentiation are well conserved between teleosts and tetrapods.

516         The zebrafish genome contains two *Wnt4*-related genes, *wnt4a* and *wnt4b*, while  
517 the mammalian genome contains a single *WNT4* gene (Ungar *et al.* 1995; Liu *et al.*  
518 2000). Although many gene duplicates in teleosts are the result of an additional whole  
519 genome duplication event that occurred after the teleost and tetrapod lineages diverged

520 (Amores *et al.* 1998; Postlethwait *et al.* 1998; Jaillon *et al.* 2004), our phylogenetic  
521 analysis argues that the duplication event that produced *wnt4a* and *wnt4b* predated the  
522 teleost-tetrapod divergence. Specifically, while mammals have only a single copy of  
523 *Wnt4*, coelacanth and birds (among basally diverging lobe-finned fish) and spotted gar  
524 (among basally diverging ray-finned fish) contain two orthologs of *Wnt4*. Based on  
525 sequence comparisons and analysis of conserved synteny, it is clear that the single  
526 *Wnt4* copy that remains in mammals is the ortholog of the teleost *wnt4a* gene, indicating  
527 that the ortholog of *wnt4b* was lost at some point after the mammalian lineage diverged  
528 from the turtle and bird lineages. Thus, although we do not propose a name change for  
529 practical reasons, in principle, the human gene should be called *WNT4A* to match its  
530 teleost ortholog, or the teleost gene should be called simply *wnt4* to match its  
531 mammalian ortholog.

532         The early gonad in mammals is bipotential, and expresses *Wnt4* initially in the  
533 mesonephros underlying the *Fgf9*-expressing gonadal epithelium (Vainio *et al.* 1999).  
534 Mutational analysis has shown that *Wnt4* and *Fgf9* are mutually antagonistic during  
535 mammalian sex determination: loss of *Wnt4* function in XX mammals leads to  
536 upregulation of *Fgf9* and partial female-to-male sex reversal (Vainio *et al.* 1999),  
537 whereas loss of *Fgf9* in XY individuals results in stabilized expression of *Wnt4* and  
538 partial male-to-female sex reversal (Kim *et al.* 2006). During normal development, *Sox9*  
539 expression in the gonad, which is initiated by the mammalian Y-linked male sex-  
540 determinant *SRY*, leads to up-regulation of *Fgf9*, which in turn down-regulates *Wnt4*. In  
541 contrast, in the absence of *Sox9* expression, as occurs normally in XX mammals, *Wnt4*  
542 represses *Fgf9*, thus promoting female development (Kim *et al.* 2006).



543           We have shown here that the phenotypes caused by *wnt4a* mutations in  
544 zebrafish, such as masculinization of the gonad and disturbed sex duct development,  
545 parallel those of *Wnt4* mutant mammals, yet it is not clear whether the mechanisms by  
546 which *Wnt4a* promotes ovarian and gonadal duct development are conserved. Our  
547 results clearly show that, as in mammals, *wnt4a* is expressed in somatic gonadal cells  
548 during the bipotential phase of gonad development. However, while the genome of a  
549 basal teleost, the spotted gar, contains an ortholog of *Fgf9* (Braasch *et al.* 2016),  
550 orthologs of *Fgf9* have not been found in the genomes of other teleosts, including  
551 zebrafish (Itoh and Konishi 2007), suggesting that this gene was lost during early teleost  
552 evolution. It therefore remains to be determined if another *Fgf* ligand plays a similar role  
553 in teleosts to that of mammalian *Fgf9* in opposing the action of *Wnt4a* during sex  
554 determination.

555           Three noteworthy features differ between the phenotypes of zebrafish and  
556 mammalian *Wnt4* mutants. First, loss-of-function *Wnt4* mutants in mice and humans are  
557 lethal (Vainio *et al.* 1999; Mandel *et al.* 2008), whereas zebrafish *wnt4a* mutants are  
558 viable. It is likely that in mammals the lethal phenotype of *Wnt4* mutants is due to an  
559 additional and essential function of *Wnt4* during the development of non-gonadal  
560 tissues. If so, then the viability of *wnt4a* mutant zebrafish may be the result of *Wnt4b*  
561 function in non-gonadal tissue development. For example, in mouse and zebrafish,  
562 *Wnt4* and *wnt4b*, respectively, are expressed in the floorplate of the spinal cord and  
563 brain (Parr *et al.* 1993; Liu *et al.* 2000; Agalliu *et al.* 2009; Duncan *et al.* 2015). In  
564 addition, lethality of *WNT4* mutant mice and humans is likely due to kidney failure  
565 (Vainio *et al.* 1999; Mandel *et al.* 2008). To date, however, the expression of either

566 *wnt4a* or *wnt4b* has not been reported in the pronephros, the zebrafish equivalent to the  
567 mammalian kidney. Regardless, it remains to be determined if simultaneous loss *wnt4a*  
568 and *wnt4b* in zebrafish will cause embryonic lethality.

569         Second, in mammals, XX Wnt4 mutants are partially sex reversed to males and  
570 germ cells undergo apoptosis, whereas in zebrafish, all *wnt4a* mutants produce  
571 functional gametes, including the 4-6% of Wnt4a mutants that develop as females. It is  
572 likely that this difference results from the observation that in mammals, gametes do not  
573 survive if the gonadal sex is opposite of the somatic sex, regardless of the direction of  
574 sex reversal (Uhlenhaut *et al.* 2009; Matson *et al.* 2011). In contrast, ample evidence  
575 shows that in many teleost, including zebrafish and medaka, the gamete type produced  
576 by premeiotic germ cells can readily switch to match the sexual phenotype of the  
577 somatic gonad, regardless of whether the phenotype matches the genetic sex of the  
578 animal (Yamamoto 1958; Dranow *et al.* 2013, 2016; Wong and Collodi 2013).

579         Third, unlike mammals, Wnt4a in zebrafish appears to facilitate, but is not  
580 essential for, female development, because a small percentage of *wnt4a* mutants  
581 develop normal ovaries. Two models could explain this difference. First, it is possible  
582 that Wnt4b can partial compensate for loss of Wnt4a during female sex determination or  
583 differentiation. Alternatively, it is possible that female development of *wnt4a* mutants is  
584 related to the numbers of oocytes that these individuals possess during the critical sex-  
585 determining window. During this time period (10dpf-20dpf), all zebrafish juveniles  
586 produce several early stage oocytes and mounting evidence shows that the number of  
587 oocytes an individual produces during the bipotential phase correlates with the eventual  
588 sex of the animal: animals that produce few or no oocytes become male, whereas those

589 that produce many oocytes can become female (Uchida *et al.* 2002; Rodríguez-Marí *et*  
590 *al.* 2010; Dai *et al.* 2015). While it is not known for certain, it is likely that oocytes  
591 produce a signal that acts on the somatic gonad to promote female sex determination  
592 and absent a threshold amount, animals develop as males (Figure 6A). We therefore  
593 propose two general models that the role of Wnt4a during normal sex determination.  
594 First, it is possible that Wnt4a may regulate the sensitivity of the somatic gonad to the  
595 oocyte-produced signal, such that, in wild-type gonad, fewer oocytes are required to  
596 reach the critical threshold necessary to stabilize female sex determination relative to  
597 *wnt4a* mutant gonads (Figure 6B). Alternatively, Wnt4a may act on germ cells to  
598 regulate the level of signal produced (Figure 6C), either by directly regulating the  
599 amount of signal each oocyte produces or effecting the number of oocytes produced per  
600 animal. Regardless, our observation that some *wnt4a* mutants can develop as females  
601 suggests that above a certain level of signal, Wnt4a function is not required for female  
602 development.

603 Finally, we have shown that both male and female *wnt4a* mutants are unable to  
604 release their gametes due to defects in reproductive duct development. In mammals,  
605 the reproductive ducts of males and females develop from separate embryonic  
606 structures, the Müllerian duct in females and the Wolffian duct in males. These  
607 reproductive duct anlagen initially develop in both males and females during early  
608 embryogenesis, but after definitive sex determination has occurred, the Müllerian ducts  
609 degenerate in males, while the Wolffian ducts degenerate in females. Loss of Wnt4  
610 function in mice inhibits Müllerian duct formation in both males and females, but does  
611 not affect the development of the Wolffian ducts (Vainio *et al.* 1999). This finding

612 suggests that the reproductive ducts in both male and female zebrafish are  
613 developmentally similar to the Müllerian ducts in mammals and may therefore share a  
614 common evolutionary origin. Recent studies in mice have shown that WNT4 regulates  
615 the direction of Müllerian duct precursor cell migration (Prunskaitė-Hyyryläinen *et al.*  
616 2015). How Wnt4a regulates ductal development in zebrafish remains to be determined.

617 In conclusion, results presented here establish that Wnt4 is likely a regulator of  
618 female sex determination and reproductive duct development in the last common  
619 ancestor of humans and zebrafish 450 million years ago. As such, these results  
620 provide further evidence that the core pathway for sex determination and  
621 differentiation in tetrapod vertebrates appears to be largely conserved in the teleost  
622 lineage.

623

#### 624 ACKNOWLEDGEMENTS

625 This work was made possible by generous funding from the following sources,  
626 T32ES0070599 (Michelle Kossack), T32HD008348 (Samantha High), R01 GM085318  
627 (John Postlethwait), and IOS-1456737 (Bruce Draper). The Olympus FV1000 confocal  
628 used in this study was purchased using NIH Shared Instrumentation Grant  
629 1S10RR019266-01. We thank the MCB Light Microscopy Imaging Facility, which is a  
630 UC-Davis Campus Core Research Facility, for the use of this microscope. MicroCT was  
631 supported by a pilot grant from the University of California-Davis Center for Molecular  
632 and Genomic Imaging. We would also like to thank the members of the Draper and

633 Postlethwait labs especially Matt McFaul, Anastasia Utkina, Becky Wong, and Trevor  
634 Enright for their contributions.

635

## 636 REFERENCES

637 Agalliu D., S. Takada, I. Agalliu, A. P. McMahon, and T. M. Jessell, 2009 Motor Neurons  
638 with Axial Muscle Projections Specified by Wnt4/5 Signaling. *Neuron* 61: 708–720.  
639 <https://doi.org/10.1016/J.NEURON.2008.12.026>

640 Amores A., A. Force, Y.-L. Yan, L. Joly, C. Amemiya, *et al.*, 1998 Zebrafish hox Clusters  
641 and Vertebrate Genome Evolution. *Science*. 282: 1711–1714.

642 Amores A., J. Catchen, A. Ferrara, Q. Fontenot, and J. H. Postlethwait, 2011 Genome  
643 Evolution and Meiotic Maps by Massively Parallel DNA Sequencing: Spotted Gar,  
644 an Outgroup for the Teleost Genome Duplication. *Genetics* 188: 799 LP-808.

645 Anderson J. L., A. Marí, I. Braasch, A. Amores, P. Hohenlohe, *et al.*, 2012 Multiple sex-  
646 associated regions and a putative sex chromosome in zebrafish revealed by RAD  
647 mapping and population genomics. *PLoS One* 7.  
648 <https://doi.org/10.1371/journal.pone.0040701>

649 Bowles J., C.-W. Feng, C. Spiller, T.-L. Davidson, A. Jackson, *et al.*, 2010 FGF9  
650 Suppresses Meiosis and Promotes Male Germ Cell Fate in Mice. *Dev. Cell* 19:  
651 440–449. <https://doi.org/https://doi.org/10.1016/j.devcel.2010.08.010>

652 Braasch I., A. R. Gehrke, J. J. Smith, K. Kawasaki, T. Manousaki, *et al.*, 2016 The  
653 spotted gar genome illuminates vertebrate evolution and facilitates human-teleost

- 654 comparisons. *Nat Genet* 48: 427–437. <https://doi.org/10.1038/ng.3526>  
655 <http://www.nature.com/ng/journal/v48/n4/abs/ng.3526.html#supplementary->  
656 information
- 657 Bradley K. M., J. P. Breyer, D. B. Melville, K. W. Broman, E. W. Knapik, *et al.*, 2011 An  
658 SNP-Based Linkage Map for Zebrafish Reveals Sex Determination Loci.  
659 *Genes|Genomes|Genetics* 1: 3–9. <https://doi.org/10.1534/g3.111.000190>
- 660 Choe C. P., A. Collazo, L. A. Trinh, L. Pan, C. B. Moens, *et al.*, 2013 Wnt-Dependent  
661 Epithelial Transitions Drive Pharyngeal Pouch Formation. *Dev. Cell* 24: 296–309.  
662 <https://doi.org/http://dx.doi.org/10.1016/j.devcel.2012.12.003>
- 663 Dahlem T. J., K. Hoshijima, M. J. Juryneec, D. Gunther, C. G. Starker, *et al.*, 2012  
664 Simple Methods for Generating and Detecting Locus-Specific Mutations Induced  
665 with TALENs in the Zebrafish Genome. *PLOS Genet.* 8: e1002861.  
666 <https://doi.org/10.1371/journal.pgen.1002861>
- 667 Dai X., X. Jin, X. Chen, J. He, and Z. Yin, 2015 Sufficient Numbers of Early Germ Cells  
668 Are Essential for Female Sex Development in Zebrafish. *PLoS One* 10: e0117824.  
669 <https://doi.org/10.1371/journal.pone.0117824>
- 670 Dehal P., and J. L. Boore, 2005 Two Rounds of Whole Genome Duplication in the  
671 Ancestral Vertebrate. *PLOS Biol.* 3: e314.
- 672 Dranow D. B., R. P. Tucker, and B. W. Draper, 2013 Germ cells are required to  
673 maintain a stable sexual phenotype in adult zebrafish. *Dev. Biol.* 376: 43–50.
- 674 Dranow D. B., K. Hu, A. M. Bird, S. T. Lawry, M. T. Adams, *et al.*, 2016 *Bmp15* Is an

- 675 Oocyte-Produced Signal Required for Maintenance of the Adult Female Sexual  
676 Phenotype in Zebrafish. *PLoS Genet* 12: e1006323.  
677 <https://doi.org/10.1371/journal.pgen.1006323>
- 678 Draper B. W., 2012 Identification of Oocyte Progenitor Cells in the Zebrafish Ovary, pp.  
679 157–165 in *Progenitor Cells: Methods and Protocols*, edited by Mace A. K., Braun  
680 M. K. Humana Press, Totowa, NJ.
- 681 Duncan R. N., S. Panahi, T. Piotrowski, and R. I. Dorsky, 2015 Identification of wnt  
682 genes expressed in neural progenitor zones during zebrafish brain development.  
683 *PLoS One* 10. <https://doi.org/10.1371/journal.pone.0145810>
- 684 Hoppler S., J. D. Brown, and R. T. Moon, 1996 Expression of a dominant-negative Wnt  
685 blocks induction of MyoD in *Xenopus* embryos. *Genes Dev.* 10: 2805–2817.
- 686 Howe K., M. D. Clark, C. F. Torroja, J. Tarrance, C. Berthelot, *et al.*, 2013 The zebrafish  
687 reference genome sequence and its relationship to the human genome. *Nature*  
688 496: 498–503. <https://doi.org/10.1038/nature12111>
- 689 Itoh N., and M. Konishi, 2007 The zebrafish fgf family. *Zebrafish* 4: 179–186.  
690 <https://doi.org/10.1089/zeb.2007.0509>
- 691 Jaillon O., J.-M. Aury, F. Brunet, J.-L. Petit, N. Stange-Thomann, *et al.*, 2004 Genome  
692 duplication in the teleost fish *Tetraodon nigroviridis* reveals the early vertebrate  
693 proto-karyotype. *Nature* 431: 946.
- 694 Jameson S. A., Y.-T. Lin, and B. Capel, 2012 Testis development requires the  
695 repression of Wnt4 by Fgf signaling. *Dev. Biol.* 370: 24–32.

- 696 <https://doi.org/10.1016/J.YDBIO.2012.06.009>
- 697 Janda C. Y., D. Waghray, A. M. Levin, C. Thomas, and K. C. Garcia, 2012 Structural  
698 Basis of Wnt Recognition by Frizzled. *Science*. 337: 59–64.  
699 <https://doi.org/10.1126/science.1222879>
- 700 Kim Y., A. Kobayashi, R. Sekido, L. DiNapoli, J. Brennan, *et al.*, 2006 Fgf9 and Wnt4  
701 act as antagonistic signals to regulate mammalian sex determination. *PLoS Biol* 4:  
702 e187. <https://doi.org/10.1371/journal.pbio.0040187>
- 703 Leerberg D. M., K. Sano, and B. W. Draper, 2017 Fibroblast growth factor signaling is  
704 required for early somatic gonad development in zebrafish. *PLOS Genet*. 1–28.  
705 <https://doi.org/10.1371/journal.pgen.1006993>
- 706 Lin Q., J. Mei, Z. Li, X. Zhang, L. Zhou, *et al.*, 2017 *Distinct and Cooperative Roles of*  
707 *amh and dmrt1 in Self-Renewal and Differentiation of Male Germ Cells in*  
708 *Zebrafish*.
- 709 Liu A., A. Majumdar, H. E. Schauerte, P. Haffter, and I. A. Drummond, 2000 Zebrafish  
710 wnt4b expression in the floor plate is altered in sonic hedgehog and gli-2 mutants.  
711 *Mech. Dev*. 91: 409–413. [https://doi.org/10.1016/S0925-4773\(99\)00308-1](https://doi.org/10.1016/S0925-4773(99)00308-1)
- 712 Maack G., and H. Segner, 2003 Morphological development of the gonads in zebrafish.  
713 *J. Fish Biol*. 62: 895–906. <https://doi.org/10.1046/j.1095-8649.2003.00074.x>
- 714 Mandel H., R. Shemer, Z. U. Borochowitz, M. Okopnik, C. Knopf, *et al.*, 2008 SERKAL  
715 Syndrome: An Autosomal-Recessive Disorder Caused by a Loss-of-Function  
716 Mutation in WNT4. *Am. J. Hum. Genet*. 82: 39–47.



- 717 <https://doi.org/10.1016/j.ajhg.2007.08.005>
- 718 Matson C. K., M. W. Murphy, A. L. Sarver, M. D. Griswold, V. J. Bardwell, *et al.*, 2011  
719 DMRT1 prevents female reprogramming in the postnatal mammalian testis. *Nature*  
720 476: 101–105. <https://doi.org/10.1038/nature10239>
- 721 Miller J. R., 2002 The Wnts. *Genome Biol.* 3: 1–15.
- 722 Moens C. B., 2009 Curation of TILLING Database Links. ZFIN Direct Data
- 723 Nusse R., and H. Clevers, 2017 Wnt/ $\beta$ -Catenin Signaling, Disease, and Emerging  
724 Therapeutic Modalities. *Cell* 169: 985–999.  
725 <https://doi.org/10.1016/j.cell.2017.05.016>
- 726 Parr B. A., M. J. Shea, G. Vassileva, and A. P. McMahon, 1993 Mouse Wnt genes  
727 exhibit discrete domains of expression in the early embryonic CNS and limb buds.  
728 *Development* 119: 247 LP-261.
- 729 Pellegrino M., R. Maiorino, and S. Schonauer, 2010 WNT4 signaling in female gonadal  
730 development. *Endocr. Metab. Immune Disord. Drug Targets* 10: 168–174.
- 731 Postlethwait J., A. Amores, A. Force, and Y.-L. Yan, 1998 Chapter 8 The Zebrafish  
732 Genome, pp. 149–163 in *The Zebrafish: Genetics and Genomics*, edited by Detrich  
733 H. W., Westerfield M., Zon L. I. B. T.-M. in C. B. Academic Press.
- 734 Prunskaitė-Hyyryläinen R., I. Skovorodkin, Q. Xu, I. Miinalainen, J. Shan, *et al.*, 2015  
735 Wnt4 coordinates directional cell migration and extension of the müllerian duct  
736 essential for ontogenesis of the female reproductive tract. *Hum. Mol. Genet.* 25:  
737 1059–1073. <https://doi.org/10.1093/hmg/ddv621>

- 738 Rodríguez-Marí A., Y.-L. Yan, R. A. BreMiller, C. Wilson, C. Cañestro, *et al.*, 2005  
739 Characterization and expression pattern of zebrafish anti-Müllerian hormone (amh)  
740 relative to sox9a, sox9b, and cyp19a1a, during gonad development. *Gene Expr.*  
741 *Patterns* 5: 655–667. <https://doi.org/http://dx.doi.org/10.1016/j.modgep.2005.02.008>
- 742 Rodríguez-Marí A., C. Cañestro, R. A. BreMiller, A. Nguyen-Johnson, K. Asakawa, *et*  
743 *al.*, 2010 Sex reversal in zebrafish fancl mutants is caused by Tp53-mediated germ  
744 cell apoptosis. *PLoS Genet.* 6: 1–14. <https://doi.org/10.1371/journal.pgen.1001034>
- 745 Siegfried K. R., and C. Nüsslein-Volhard, 2008 Germ line control of female sex  
746 determination in zebrafish. *Dev. Biol.* 324: 277–287.  
747 <https://doi.org/10.1016/j.ydbio.2008.09.025>
- 748 Slanchev K., J. Stebler, G. de la Cueva-Méndez, and E. Raz, 2005 Development  
749 without germ cells: The role of the germ line in zebrafish sex differentiation. *Proc.*  
750 *Natl. Acad. Sci. U. S. A.* 102: 4074–4079. <https://doi.org/10.1073/pnas.0407475102>
- 751 Smith J. J., and M. C. Keinath, 2015 The sea lamprey meiotic map improves resolution  
752 of ancient vertebrate genome duplications. *Genome Res.* 25: 1081–1090.  
753 <https://doi.org/10.1101/gr.184135.114>
- 754 Sreenivasan R., J. Jiang, X. Wang, R. Bártfai, H. Y. Kwan, *et al.*, 2014 Gonad  
755 Differentiation in Zebrafish Is Regulated by the Canonical Wnt Signaling Pathway.  
756 *Biol. Reprod.* 90: 1–10,45. <https://doi.org/10.1095/biolreprod.113.110874>
- 757 Takahashi H., 1977 Juvenile hermaphroditism in the zebrafish, *Brachydanio rerio*. *Bull.*  
758 *Fac. Fish. Hokkaido Univ.* 28: 57–65.

- 759 Uchida D., M. Yamashita, T. Kitano, and T. Iguchi, 2002 Oocyte apoptosis during the  
760 transition from ovary-like tissue to testes during sex differentiation of juvenile  
761 zebrafish. *J. Exp. Biol.* 205: 711–718.
- 762 Uhlenhaut N. H., S. Jakob, K. Anlag, T. Eisenberger, R. Sekido, *et al.*, 2009 Somatic  
763 sex reprogramming of adult ovaries to testes by FOXL2 ablation. *Cell* 139: 1130–  
764 1142.
- 765 Ungar A. R., G. M. Kelly, and R. T. Moon, 1995 Wnt4 affects morphogenesis when  
766 misexpressed in the zebrafish embryo. *Mech. Dev.* 52: 153–164.  
767 [https://doi.org/http://dx.doi.org/10.1016/0925-4773\(95\)00386-F](https://doi.org/http://dx.doi.org/10.1016/0925-4773(95)00386-F)
- 768 Vainio S., M. Heikkila, A. Kispert, N. Chin, A. P. McMahon, *et al.*, 1999 Female  
769 development in mammals is regulated by Wnt-4 signalling. *Nature* 397: 405–409.
- 770 Vilella A. J., J. Severin, A. Ureta-Vidal, L. Heng, R. Durbin, *et al.*, 2009  
771 EnsemblCompara GeneTrees: Complete, duplication-aware phylogenetic trees in  
772 vertebrates. *Genome Res* 19: 327–335. <https://doi.org/10.1101/gr.073585.107>
- 773 Walker C., and G. Streisinger, 2007 Zebrafish Book, in *The zebrafish book: a guide for*  
774 *the laboratory use of zebrafish (Danio rerio)*, edited by Westerfield M. University of  
775 Oregon Press, Eugene.
- 776 Wang X. G., R. Bartfai, I. Sleptsova-Freidrich, and L. Orban, 2007 The timing and extent  
777 of 'juvenile ovary' phase are highly variable during zebrafish testis differentiation. *J.*  
778 *Fish Biol.* 70: 33–44.
- 779 Webster K. A., U. Schach, A. Ordaz, J. S. Steinfeld, B. W. Draper, *et al.*, 2017 Dmrt1 is

- 780 necessary for male sexual development in zebrafish. *Dev. Biol.* 422: 33–46.
- 781 <https://doi.org/10.1016/j.ydbio.2016.12.008>
- 782 Westerfield M., 2007 *The zebrafish book: A guide for the laboratory use of zebrafish*
- 783 *Danio (Brachydanio) rerio*. Westerfield, M, Eugene, OK.
- 784 Wilson C. A., S. K. High, B. M. McCluskey, A. Amores, Y. L. Yan, *et al.*, 2014 *Wild sex*
- 785 *in zebrafish: Loss of the natural sex determinant in domesticated strains*.
- 786 Wong T.T., and P. Collodi, 2013 Dorsomorphin Promotes Survival and Germline
- 787 Competence of Zebrafish Spermatogonial Stem Cells in Culture. *PLoS One* 8:
- 788 e71332. <https://doi.org/10.1371/journal.pone.0071332>
- 789 Yamamoto T.-O., 1958 Artificial induction of functional sex-reversal in genotypic
- 790 females of the medaka (*Oryzias latipes*). *J. Exp. Zool.* 137: 227–263.
- 791 <https://doi.org/10.1002/jez.1401370203>
- 792 Zhang Y., F. Li, D. Sun, J. Liu, N. Liu, *et al.*, 2011 Molecular analysis shows differential
- 793 expression of R-spondin1 in zebrafish (*Danio rerio*) gonads. *Mol. Biol. Rep.* 38:
- 794 275–282. <https://doi.org/10.1007/s11033-010-0105-3>

795

## 796 **FIGURE LEGENDS**

797 **Figure 1. Teleost *wnt4a* is the ortholog of tetrapod WNT4.** A. Phylogenetic analysis

798 shows that vertebrates have two Wnt4-related clades (designated Wnt4a and Wnt4b).

799 The Wnt4a clade includes teleosts and gar as ray-finned fish and coelacanth, birds, and

800 mammals as lobe-finned fish. The Wnt4b clade also includes teleosts and gar as ray-

801 finned fish as well as coelacanth and birds, but not mammals, as lobe-finned fish. This  
802 result shows that the duplication event that produced the *wnt4a* and *wnt4b* clades  
803 predated the divergence of ray-finned (e.g. gar, teleost) and lobed-finned (e.g.  
804 coelacanth, bird, mammal) lineages. B. A dot plot comparing zebrafish orthologs and  
805 paralogs of genes on the short arm of human chromosome-1 (Hsa1p) shows conserved  
806 synteny along zebrafish chromosome Dre11 (*wnt4a*) and Dre16 (*wnt4b*). C.  
807 Conserved synteny analysis shows that the zebrafish chromosome segments  
808 containing *wnt4a* and *wnt4b* are orthologous to regions on different spotted gar  
809 chromosomes, and that these two spotted gar chromosome show ancient paralogy.  
810 Based on phylogenetic and conserved synteny analyses, *wnt4a* and *wnt4b* were both in  
811 the last common ancestor of zebrafish and humans but mammals lost the ortholog of  
812 *wnt4b*, and *wnt4a* in teleosts is the ortholog of WNT4 in mammals.

813

814 **Figure 2. *wnt4a* is expressed in early zebrafish gonads.** Confocal images of isolated  
815 gonads stained for *wnt4a* mRNA (red), Vasa to label germ cells (green), nuclei (blue),  
816 (A-H) or *wnt4a* RNA only (A'-H'), and gonadal tissue outlined by a dotted line (A-C). At  
817 10dpf (A, A', n=8) and 12dpf (B, B', n=9) *wnt4a* RNA was detected ubiquitously in germ  
818 cells (gc) and somatic cells (sc). In contrast, *wnt4a* RNA was not detected in gonadal  
819 cells at 14dpf (C, C', n=6). At 20dpf, *wnt4a* RNA was detected in a small subset of  
820 somatic cells (D, D', n=4). At 23dpf (n=10), *wnt4a* expression was detected in somatic  
821 cells both in presumptive ovaries (E, E') and in gonads that are transitioning to testes,  
822 with cyst-like divisions to the right of the dashed line (F, F'). At 25dpf, *wnt4a* mRNA was  
823 detected in the developing ovary (G, G', n=6) but not in gonads that appeared to be

824 transitioning to testes (H, H', n=10). Scale bars = 20  $\mu$ m.

825

826 **Figure 3. Mutant *wnt4a* alleles result in male-biased populations.** A. Wnt4a is a 352  
827 amino acid protein with five exons, indicated by the alternating shaded regions. Protein  
828 structures predicted to arise from each allele are indicated by truncation,  
829 *wnt4a(fh295/fh294)* (ENU induced mutation) or insertion (CRISPR- arrowhead) resulting  
830 in missense protein coding (red bar) in uc55/uc56. B. Sex ratios in populations of  
831 homozygous *wnt4a(fh295)* and *wnt4a(uc55)* mutants were significantly male biased by  
832 anova (\* =  $p < 0.05$ , \*\* =  $p < 0.01$ , n=3 replicates). Comparison of representative wild-type  
833 (C, D, F, G, I, J, L, M) and *wnt4a* mutant (E, H, K, N) gonads stained for Vasa, to  
834 identify germ cells (green), and DAPI, to label nuclei (blue), at various ages post-  
835 fertilization (dpf). At 23dpf, *wnt4a* mutants (E) and wild-types (C, D) both have  
836 indifferent gonad morphology. In contrast, the majority of *wnt4a* mutant gonads from  
837 25dpf animals and older (H, K, N) had a morphology that is indistinguishable of wild-  
838 type testes (G, J, M), but not wild-type ovaries (F, I, L). Scale bars = 20 $\mu$ m.

839

840 **Figure 4. Duct morphology in *wnt4a* mutant and wild-type males.** From the  
841 posterior end of each testis, wild-type males developed duct deferens (A) that joined to  
842 form the fused duct deferens (B). Mutant males, however, failed to form a full duct  
843 deferens (A') or a fused duct deferens (B'). 3D renderings built from individual traces of  
844 sections (C', C'' etc) of the wild-type ducts (C) and mutant ducts (D) show that the  
845 mutant ducts never fully connected to the genital orifice. H&E stained sections of wild-

846 type females showed an oviduct that wrapped around the posterior of the ovaries (E, G,  
847 G') and extended ventroposteriorly (F, G, G'') out to the genital orifice. Mutant females,  
848 however, failed to organize an oviduct around the ovary (E, H, H') and did not form a  
849 connective duct to the genital orifice (F, H, H''). Scale bar = 100 $\mu$ m (See movies in  
850 Supplemental Figures 6 and 7.)

851

852 **Figure 5. Expression of *wnt4a* during reproductive duct development in zebrafish**  
853 **wild-type AB strain males.** Alternate serial cross sections of wild-type males were  
854 stained by H&E to follow duct growth (see Supplementary Figure 8) or prepared for *in*  
855 *situ* hybridization to reveal *wnt4a* expression, shown here. A. Expression analysis  
856 showed that at 25dpf, the duct deferens (cross section of the right duct shown here)  
857 lacked *wnt4a* expression. B. At 25dpf, however, *wnt4a* expression (black arrows)  
858 appeared dorsal to the posterior vent, just anterior to the eventual connection of the  
859 fused duct deferens and the genital orifice. C. At 35dpf, the duct deferens continued to  
860 show little *wnt4a* expression. (Insert shows the left and right duct deferens dorsal to the  
861 intestine.) D. At 35dpf, *wnt4a* expression (black arrows) appeared dorsal and lateral to  
862 the posterior vent, just anterior to the eventual connection of the fused ducti deferens  
863 and the genital orifice. E. At 55dpf in a section just anterior to the fusion of the duct  
864 deferens to the vent, *wnt4a* expression (black arrow) appeared dorsal to the posterior  
865 vent, just anterior to the connection of the fused ducti deferens and genital orifice. F. At  
866 55dpf in a section at the level of the connection of the fused duct and the vent, *wnt4a*  
867 expression (black arrow) appeared just dorsal to the genital orifice. (PD = pronephric

868 duct, FDD = fused ducti deferens, GO = genital orifice, DD = ducti deferens, RDD =  
869 right duct deferens, LDD = left duct deferens, I = intestine, V = vent) Scale bar = 100 $\mu$ m.

870

871 **Figure 6. Models for how Wnt4a functions to promote female development.** A. In  
872 wild-type animals, high concentrations of a signal produced by early-stage oocytes  
873 during the bipotential gonad stage (purple arrow) likely cause the gonadal soma to  
874 maintain production of estrogen (black arrow), which inhibits oocyte death and drives  
875 female sex determination. If the oocyte signal is too low, a male develops; if the signal  
876 exceeds a threshold, a female develops. In a wild-type population, this threshold and  
877 signal gradient produces about half males and half females. In A-C, the X-axis depicts  
878 the strength of the signal while the Y-axis plots the numbers of animals that produce a  
879 certain amount of signal. For simplicity, signal strength vs. fish number is assumed to  
880 follow a normal distribution. Color intensity reflects the probability an individual develops  
881 as a male (blue) or female (red). B. In this model, lack of Wnt4a desensitizes somatic  
882 gonad cells to the female-promoting oocyte signal, thereby raising the female-  
883 development threshold such that only those few *wnt4a* mutant animals that produce the  
884 highest signal (perhaps stochastically) can develop as females allowing most to become  
885 males. C. Alternatively, lack of Wnt4a causes oocytes to decrease the amount of  
886 female-promoting signal that they produce, such that fewer *wnt4a* mutants achieve the  
887 level required to sustain female development. Insets in B and C are graphical  
888 representations of the two models (oocyte in pink, somatic gonad cell in red or blue).

889



890 **SUPPLEMENTAL TABLE LEGENDS**

891 **Supplemental Table 1. Oligos.** Oligos listed were used in the execution of this paper,

892 5'→3'.

| Primers (5' -- 3')         |                         |                                     |
|----------------------------|-------------------------|-------------------------------------|
| Forward                    | Reverse                 | Purpose                             |
| CGGAGCTGAACATCACGTTT       | GTGGATTCTGTGCACGATGA    | <i>wnt4a</i><br>fluorescent in situ |
| AGTGTTCCCAAAGCCTCT         | GAGAAGCTGCGAGGACTCAT    | uc55 and<br>uc56<br>PCR ID          |
| GCTGCAAGTTCCACTGGT         | CTATGGGTGGGCGTGGTC      | fh294<br>PCR ID                     |
| TCTGGAGGACTGTGTAAGAGGTATGC | AGACGCACAATCTTGAGAGCAG  | rpl13a RT                           |
| TCTGAGTCCACACGTTTCCTG      | TTCATCCTGTGGAATTCTGTGAC | amh RT                              |
| CAGCCAGCAAGTTCAGTGAG       | CGCACTTTACTCAGGCCAAT    | Vasa RT                             |
| AGATGTCGAGTTAAAGATCCTGCA   | CGACCGGGTGAAAACGTAGA    | cyp19a1a<br>RT                      |
| GCTCTTTCTAGCGCTCTTCTC      | GTCACTGCAAATGCTACGCT    | <i>wnt4a</i><br>RT-PCR              |
| GTCAAGACCTGCTGGAAAGC       | CTTGCGACACTGTTTGCATT    | fh294<br>PCR ID                     |
| GCTGCAAGTTCCACTGGT         | CTATGGGTGGGCGTGGTC      | fh295<br>HRMA ID                    |
| CCGCAACCGCCGATGGAAC        | ACCGGGCGTTCTGGGGTCAT    | <i>wnt4a</i><br>color in situ       |
| AAGGTCATGCCTCCATTCCG       | AACCGCGAGGTTCCATTACA    | wnt4b<br>RT-PCR                     |

893

894 **Supplemental Table 2. Genotypic ratios of *wnt4a* mutants were normal.** The ratio  
895 of wild-type : heterozygous : mutant was not significantly different from expected  
896 Mendelian ratios, 1:2:1, consistent with normal survival.

|              | Number of Wild-types | Number of Heterozygotes | Number of Mutants | Resulting Ratio | Chi-square test |
|--------------|----------------------|-------------------------|-------------------|-----------------|-----------------|
| <b>fh295</b> | 56                   | 124                     | 51                | 1 : 2.21 : 0.91 | P = 0.48        |
| <b>fh295</b> | 162                  | 307                     | 143               | 1 : 1.90 : 0.88 | P = 0.55        |
| <b>uc55</b>  | 103                  | 202                     | 119               | 1 : 1.96 : 1.16 | P = 0.34        |
| <b>uc56</b>  | 109                  | 208                     | 79                | 1 : 1.91 : 0.72 | P = 0.06        |

897

898

#### 899 **SUPPLEMENTAL FIGURE LEGENDS**

900 **Supplemental Figure 1. In zebrafish gonads, *wnt4a* expression is female specific.**

901 RT-PCR analysis of gene expression in adult (90dpf) (A) and juvenile (30dpf) (B)

902 gonads. The germ cell-specific gene *vasa* was detected in both ovaries and testes. The

903 female-specific gene *cyp19a1a* was detected in only ovaries while the male-enriched

904 gene *amh* was detected at slightly higher levels in testes compared to ovaries.

905 Expression of *wnt4a* was only detected in ovaries, while *wnt4b* transcript appeared

906 faintly in the testies. The ribosomal protein gene *rpl13a* is ubiquitously expressed used

907 here as loading control. NRT, no reverse transcriptase control.

908

909 **Supplemental Figure 2. *wnt4a* is expressed in somatic cells that surround stage**

910 **1b oocytes in 23dpf female zebrafish.** A. Confocal micrographs showing *wnt4a* RNA-

911 expressing somatic gonadal cells (red) are closely associated with Vasa-expressing  
912 (green) oocytes. *Wnt4a* does not appear to be expressed in theca cells, which express  
913 *Tg(cyp19a1a:egfp)* (white, n=3). Red staining that overlaps with white was consistent  
914 with the background staining see throughout the tissue. B. In a simplified magnified view  
915 outlined in A, *wnt4a* localizes to the somatic cells adjacent to an oocyte with a diameter  
916 of 23 $\mu$ m. Expression of *wnt4a* is found consistently in somatic cells of stage 1b oocytes  
917 that are >20 $\mu$ m in diameter. Nuclei are stained blue. Scale bar in A, 10 $\mu$ m).

918

919 **Supplemental Figure 3. CRISPR/Cas9 mutant allele generation.** *wnt4a(uc55)* and  
920 *wnt4a(uc56)* were both generated by targeting the highlighted sequence (red) of Exon  
921 two. Mutagenesis resulted in 17bp (uc55) or 23bp (uc56) insertions (bold), PAM  
922 sequence (underlined).

923

924 **Supplemental Figure 4. *wnt4a* mutant fish have normal secondary sexual**  
925 **characteristics.** Light micrograph pictures showing that the pigment patterns and body  
926 shapes of *wnt4a(uc55)* mutant females and males (B-B''' and D-D''', respectively) are  
927 indistinguishable from their wild-type female and male siblings (A-A''' and C-C''',  
928 respectively). Panels A-D compare of body shapes. B'-D' and B''-D'' are low and high  
929 magnification views, respectively, of anal fin pigmentation. Note that males have more  
930 yellow pigmentation than females. A'''-D''' show high magnification views of the genital  
931 orifice. Note that the genital orifice of females protrudes from the ventral body wall,  
932 while those of male do not (black arrow).

933

934 **Supplemental Figure 5. *wnt4a* mutant zebrafish have normal mature gonads.** Wild-  
935 type males (A) and *wnt4a* mutant males (B) at 90dpf both have all stages of  
936 spermatogenesis and are indistinguishable. Similarly, wild-type females (C) and *wnt4a*  
937 mutant females (D) have all stages of oogenesis and are indistinguishable. Scale: 1mm

938

939 **Supplemental Figure 6. 3D renderings of the male reproductive ducts.** WT male  
940 (left) develop a fused duct deferens which is absent in the mutant (right).

941

942 **Supplemental Figure 7. 3D renderings of the female reproductive ducts.** WT  
943 female (left) develop a complete oviduct which fails to connect to the genital orifice in  
944 the mutant (right).

945

946 **Supplemental Figure 8. Growth of the male zebrafish reproductive duct over time.**  
947 Males were measured for duct elongation as a percentage of the distance between the  
948 posterior end of the testis and the genital orifice. Males were collected from 25dpf  
949 through 55dpf including adults and elderly (about 2 years old) for reference. Wild-type  
950 and *wnt4a* heterozygous males (green) had fully elongated reproductive ducts by 55dpf,  
951 while ducts in *wnt4a* mutants (yellow) never fully connected to the genital orifice.

952

Figure 1

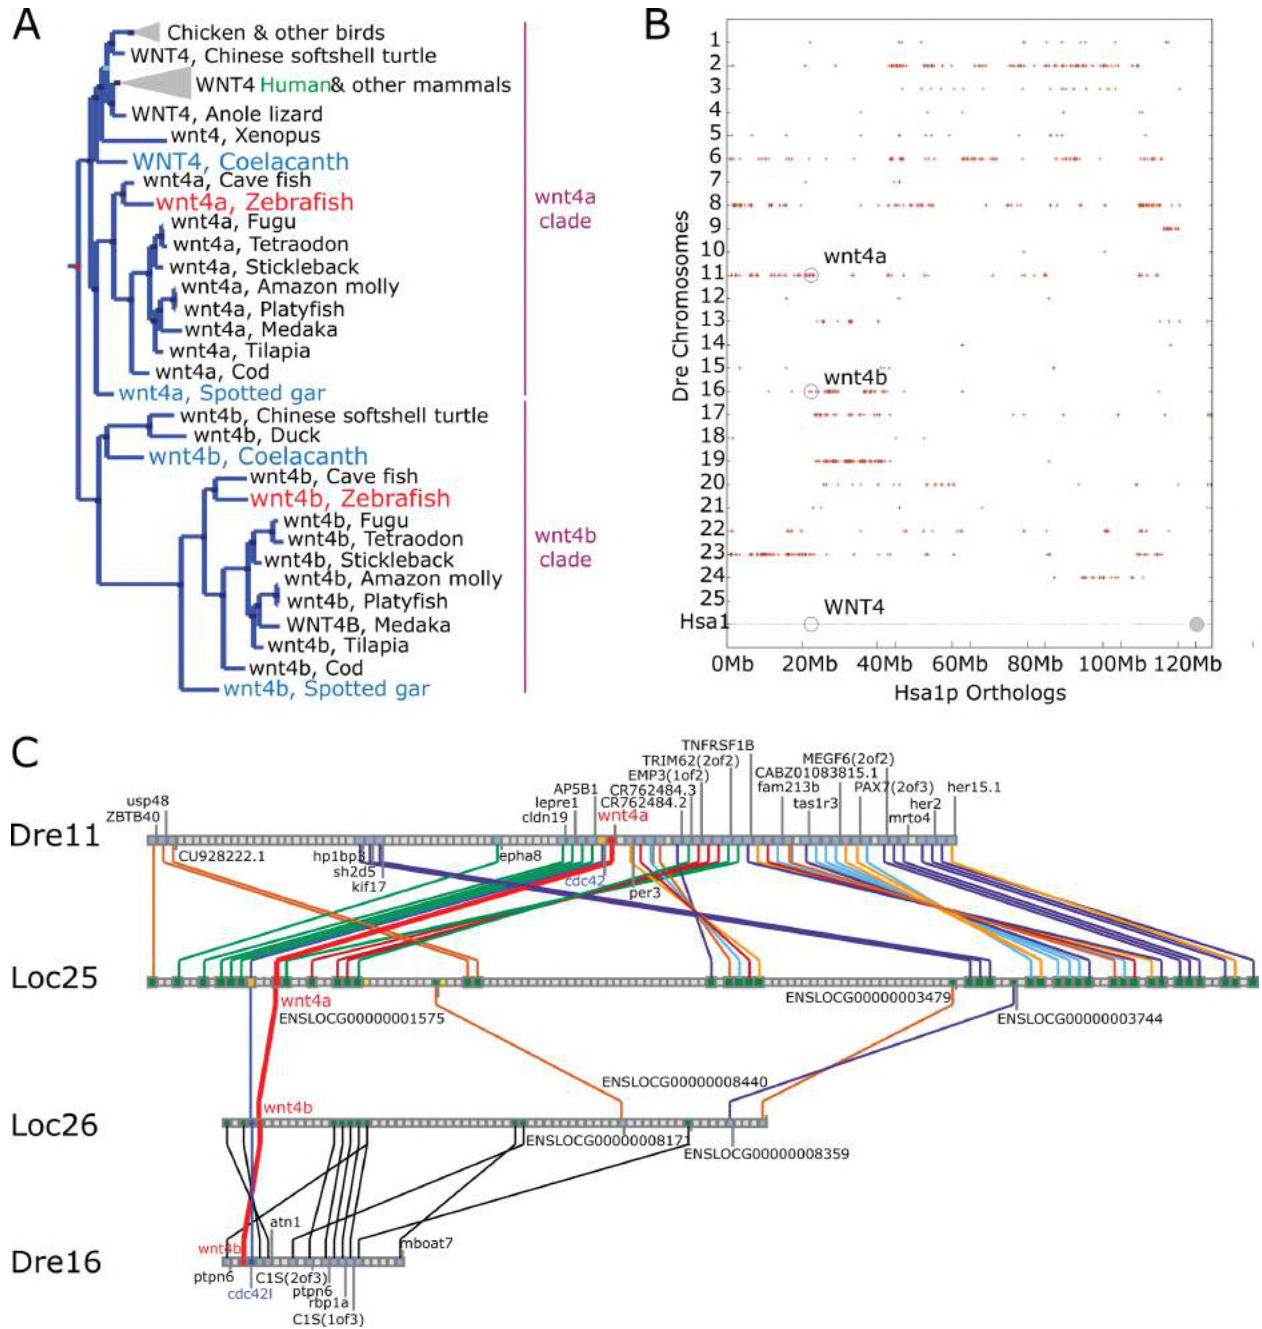

Figure 2

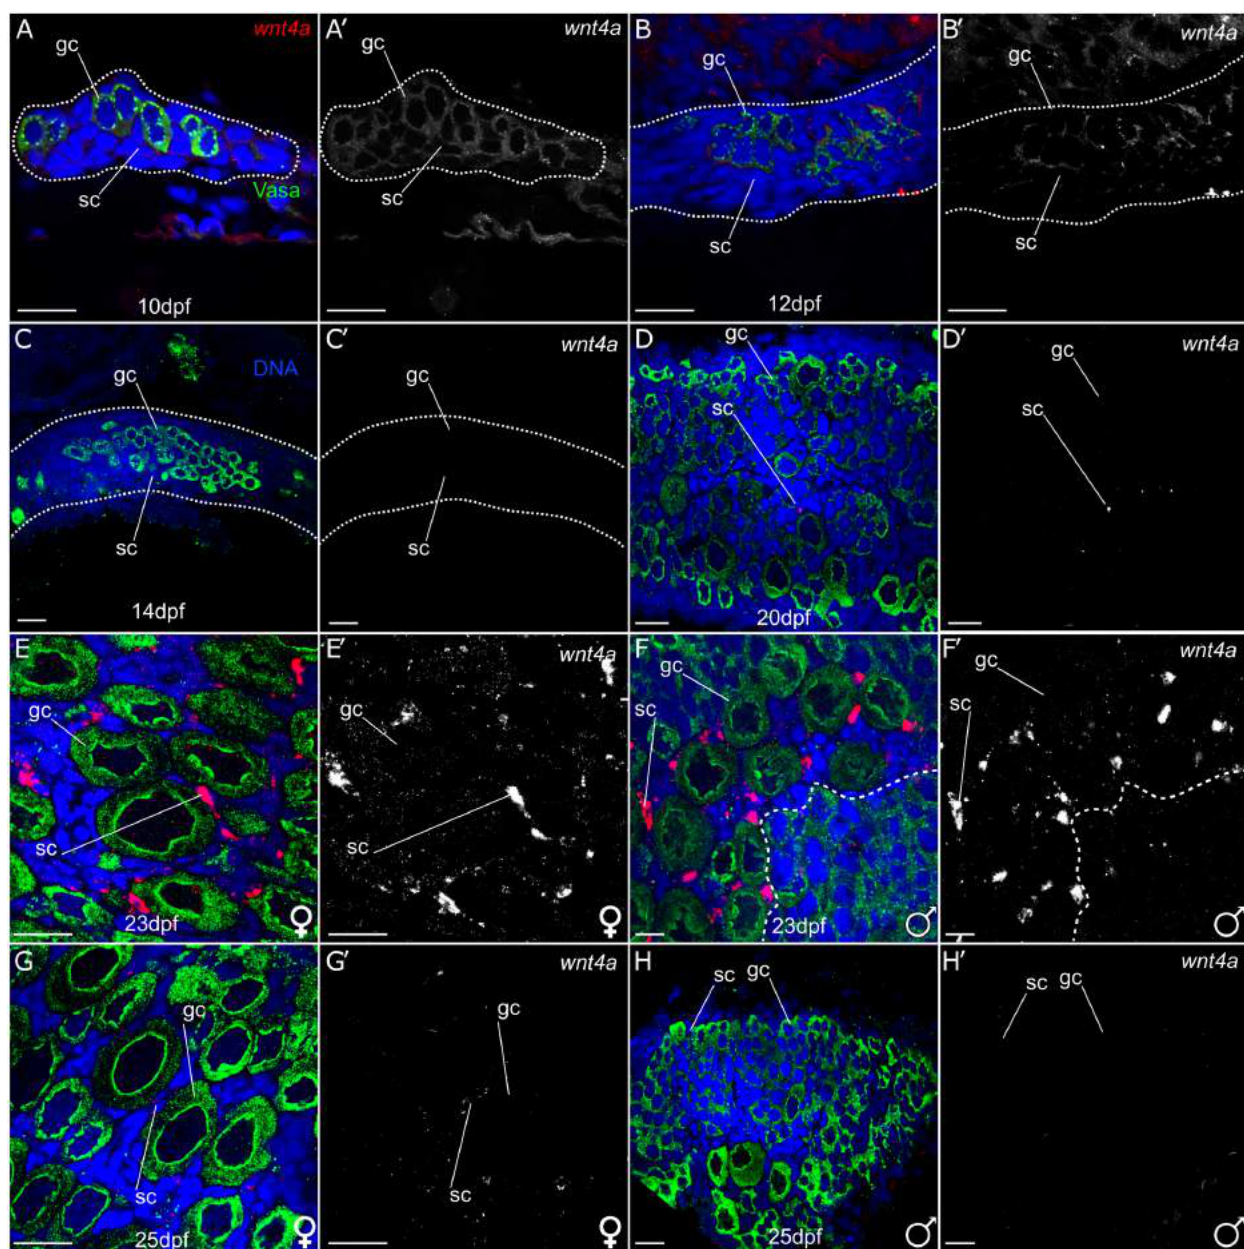

Figure 3

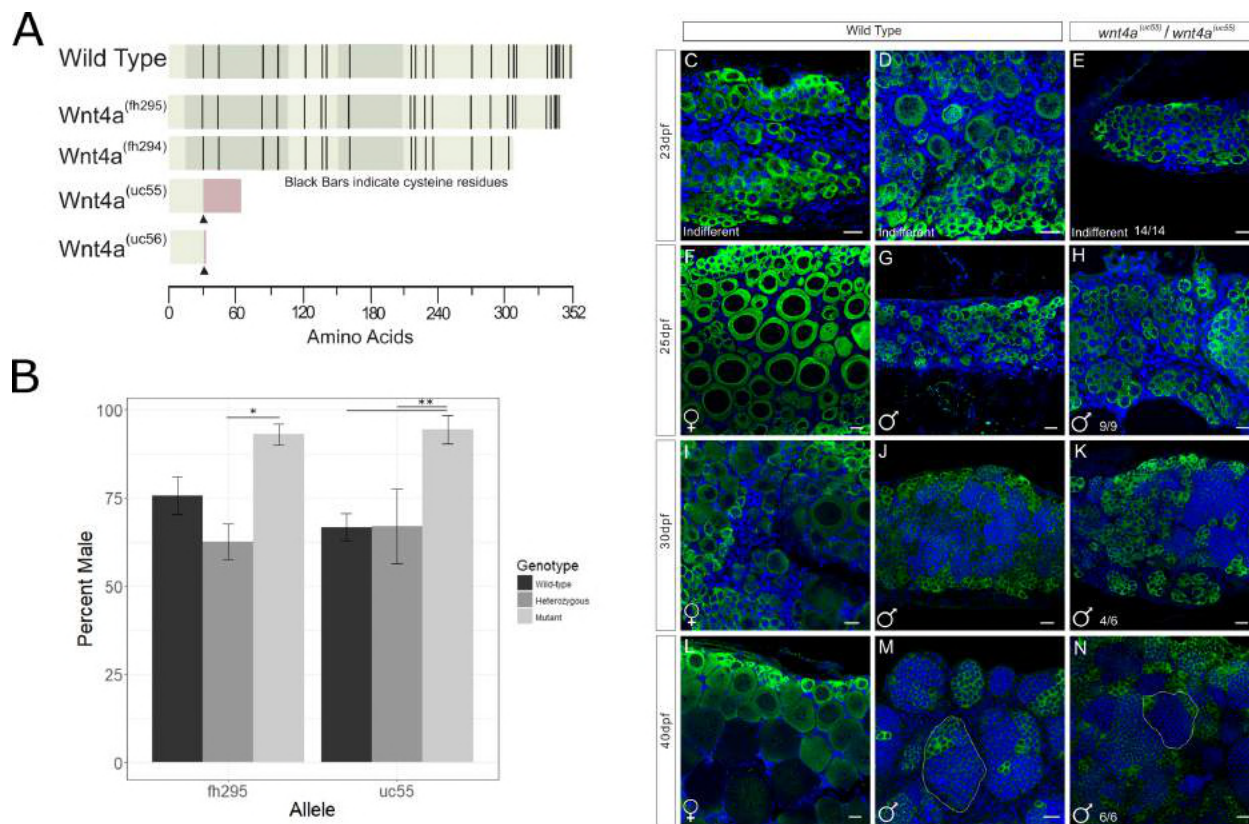

Figure 4

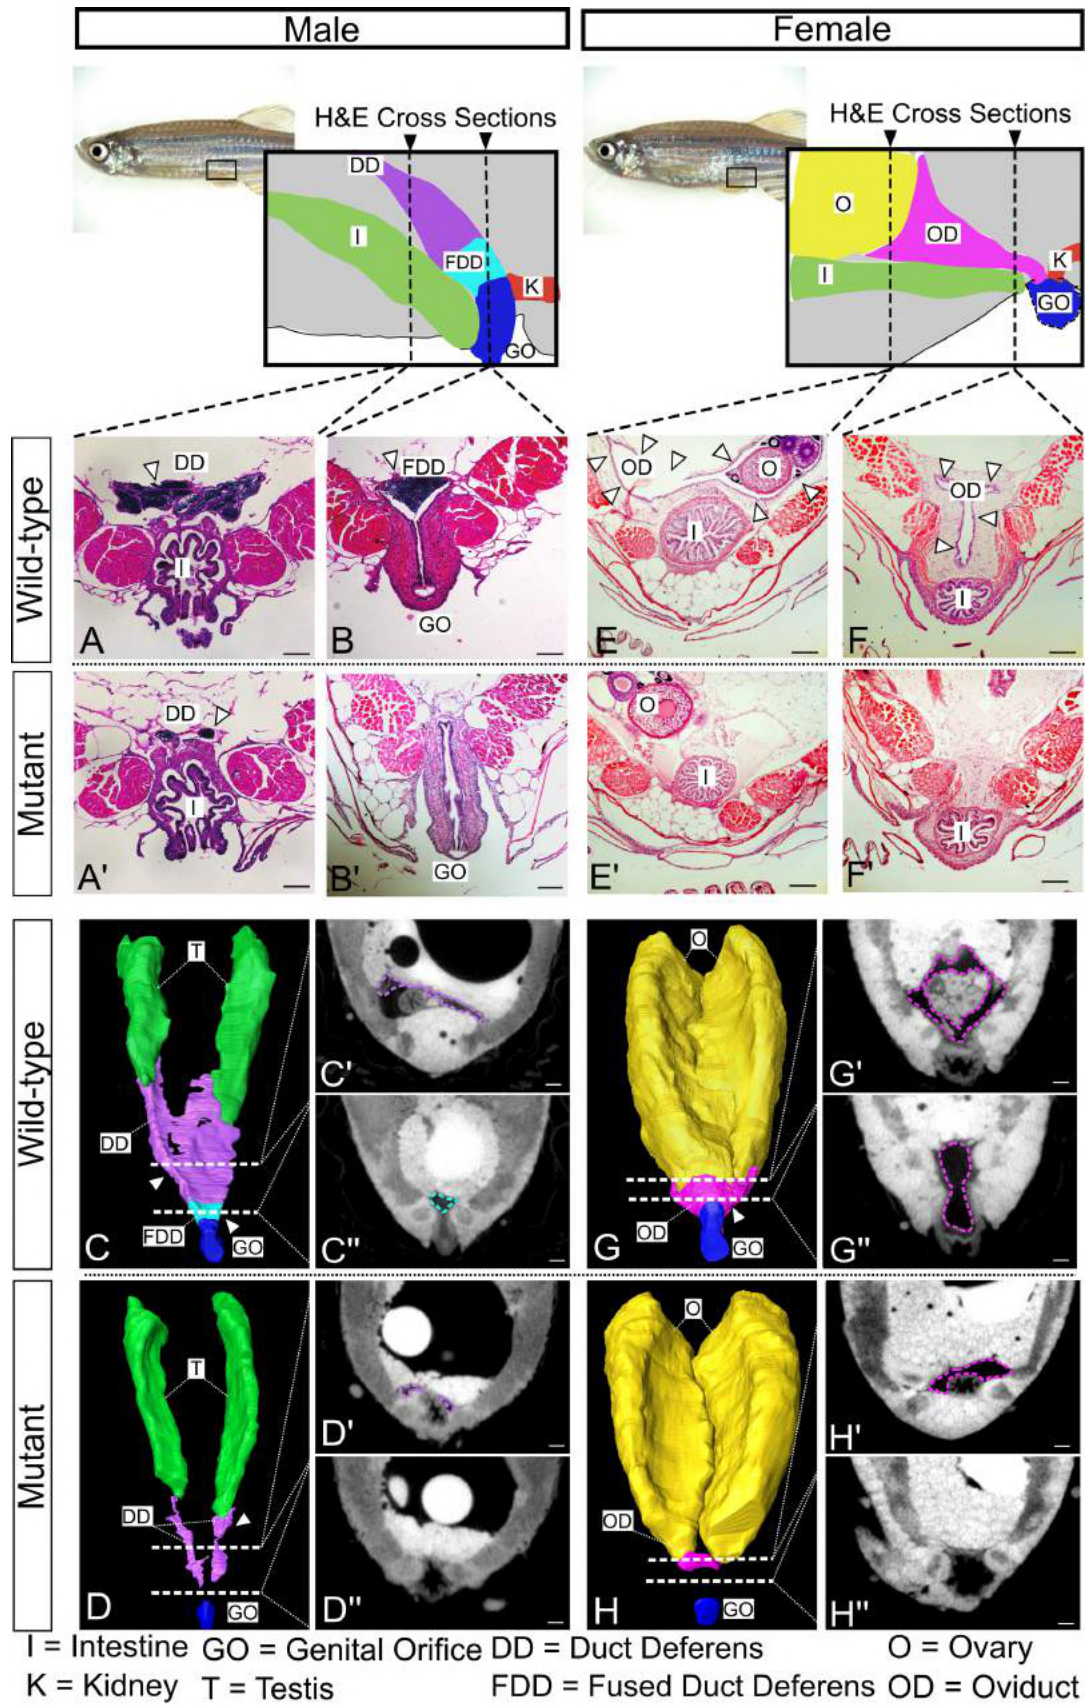



Figure 5

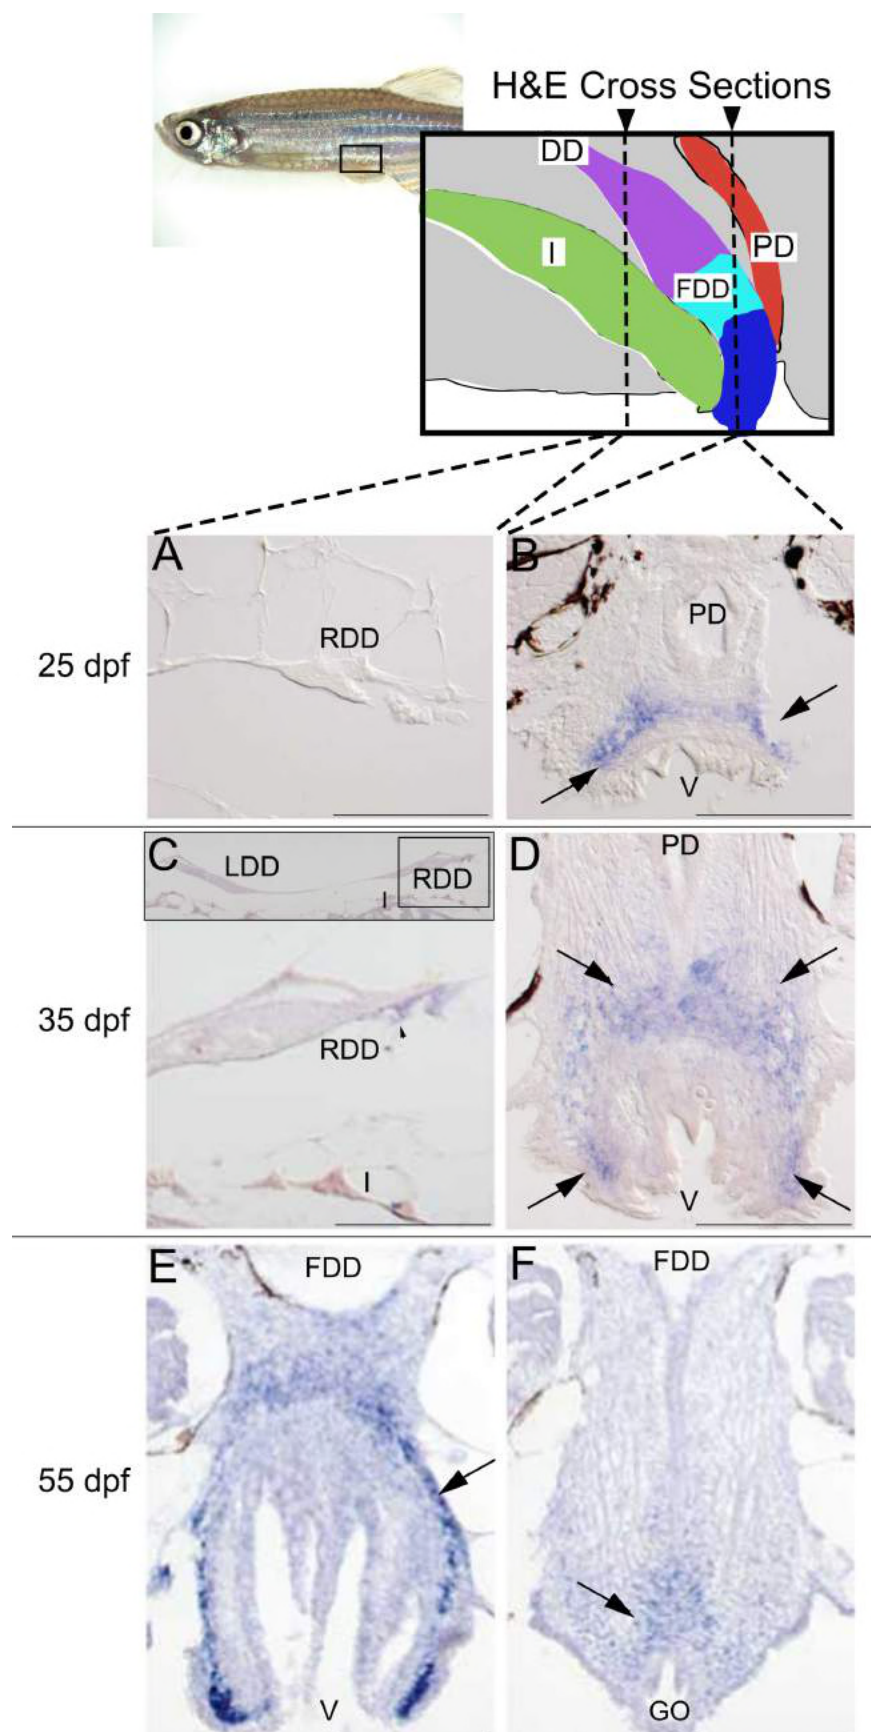

Figure 6

A

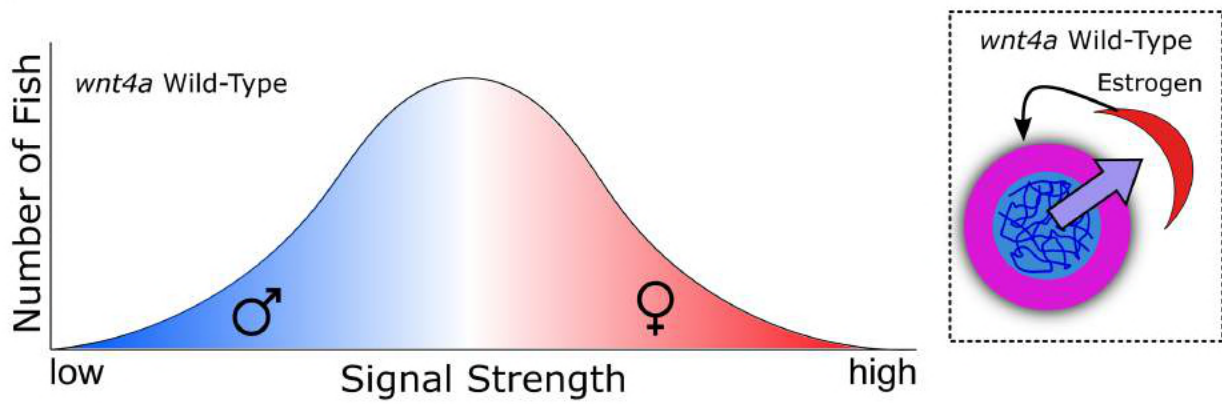

B

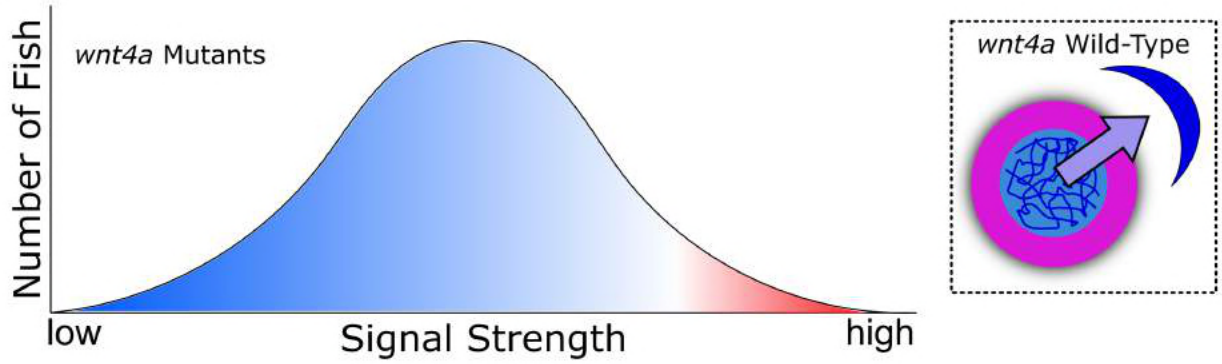

C

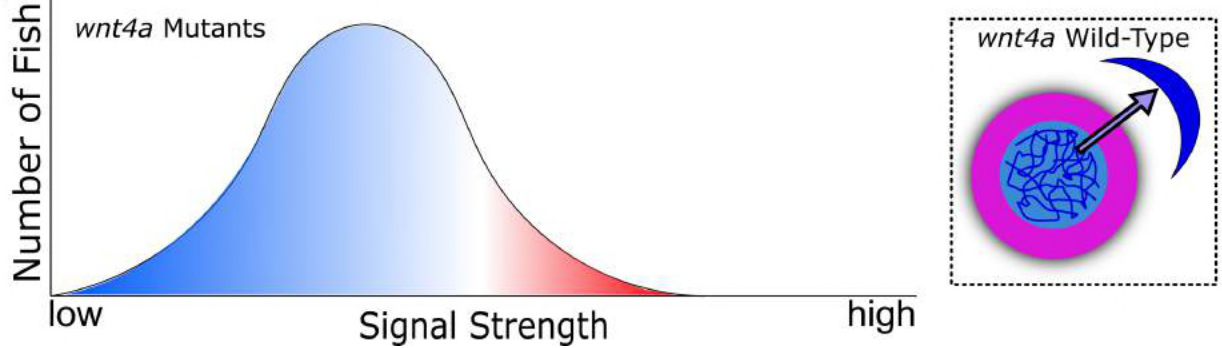

Source: https://www.biorxiv.org/content/10.1101/421362v1.full.pdf
